# Supplementary material
Source: PubMed Central journal article supplement (PMC4204782)
Supplement: supp_mcu094_mcu094supp_figs.pdf [file supp_mcu094_mcu094supp_figs.pdf]

## SUPPLEMENTARY DATA

Figs S1–S12: Ancestral character-state reconstruction of DEF- and GLO-like protein interactions. S1–S4, S7 and S8: phylogenetic trees are based on the gene phylogenies. Figs S5, S6, S9–S12: phylogenetic trees were manually drawn based on the species phylogeny. For details of the labelling, see Figure 5.

Fig. S1. Heterodimerization of DEF- with GLO-like proteins.

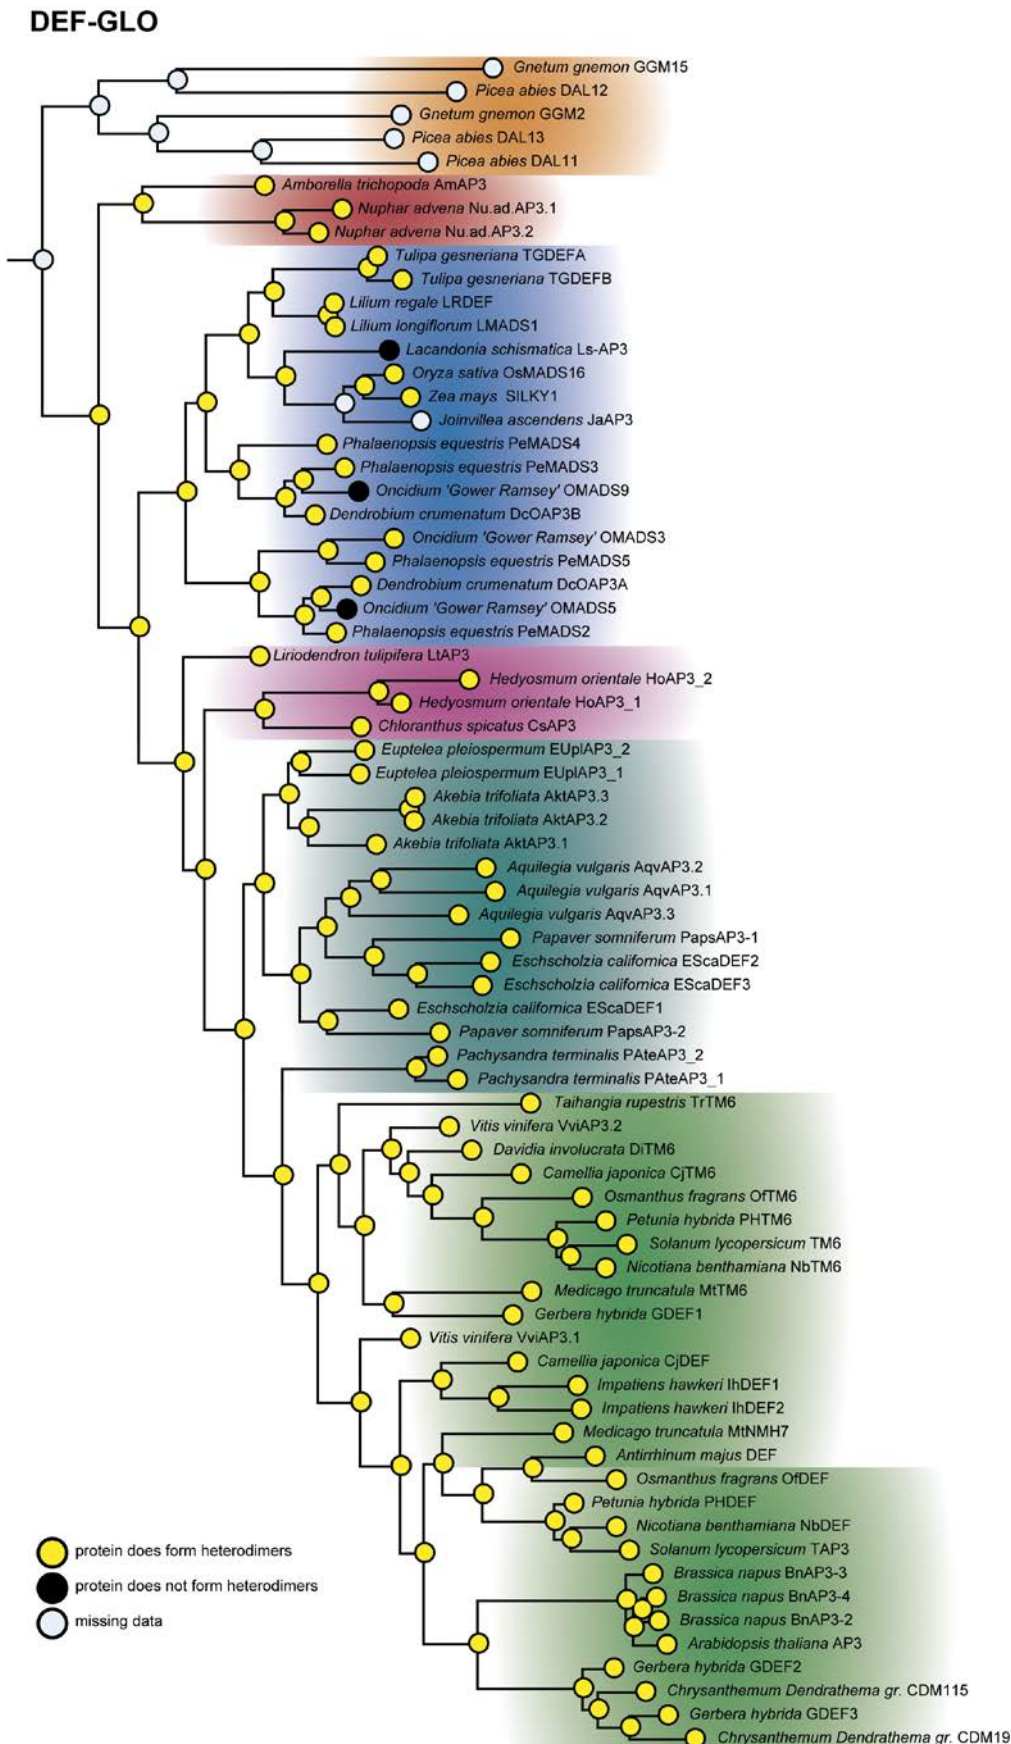

Fig. S2: Homodimerization of DEF-like proteins.

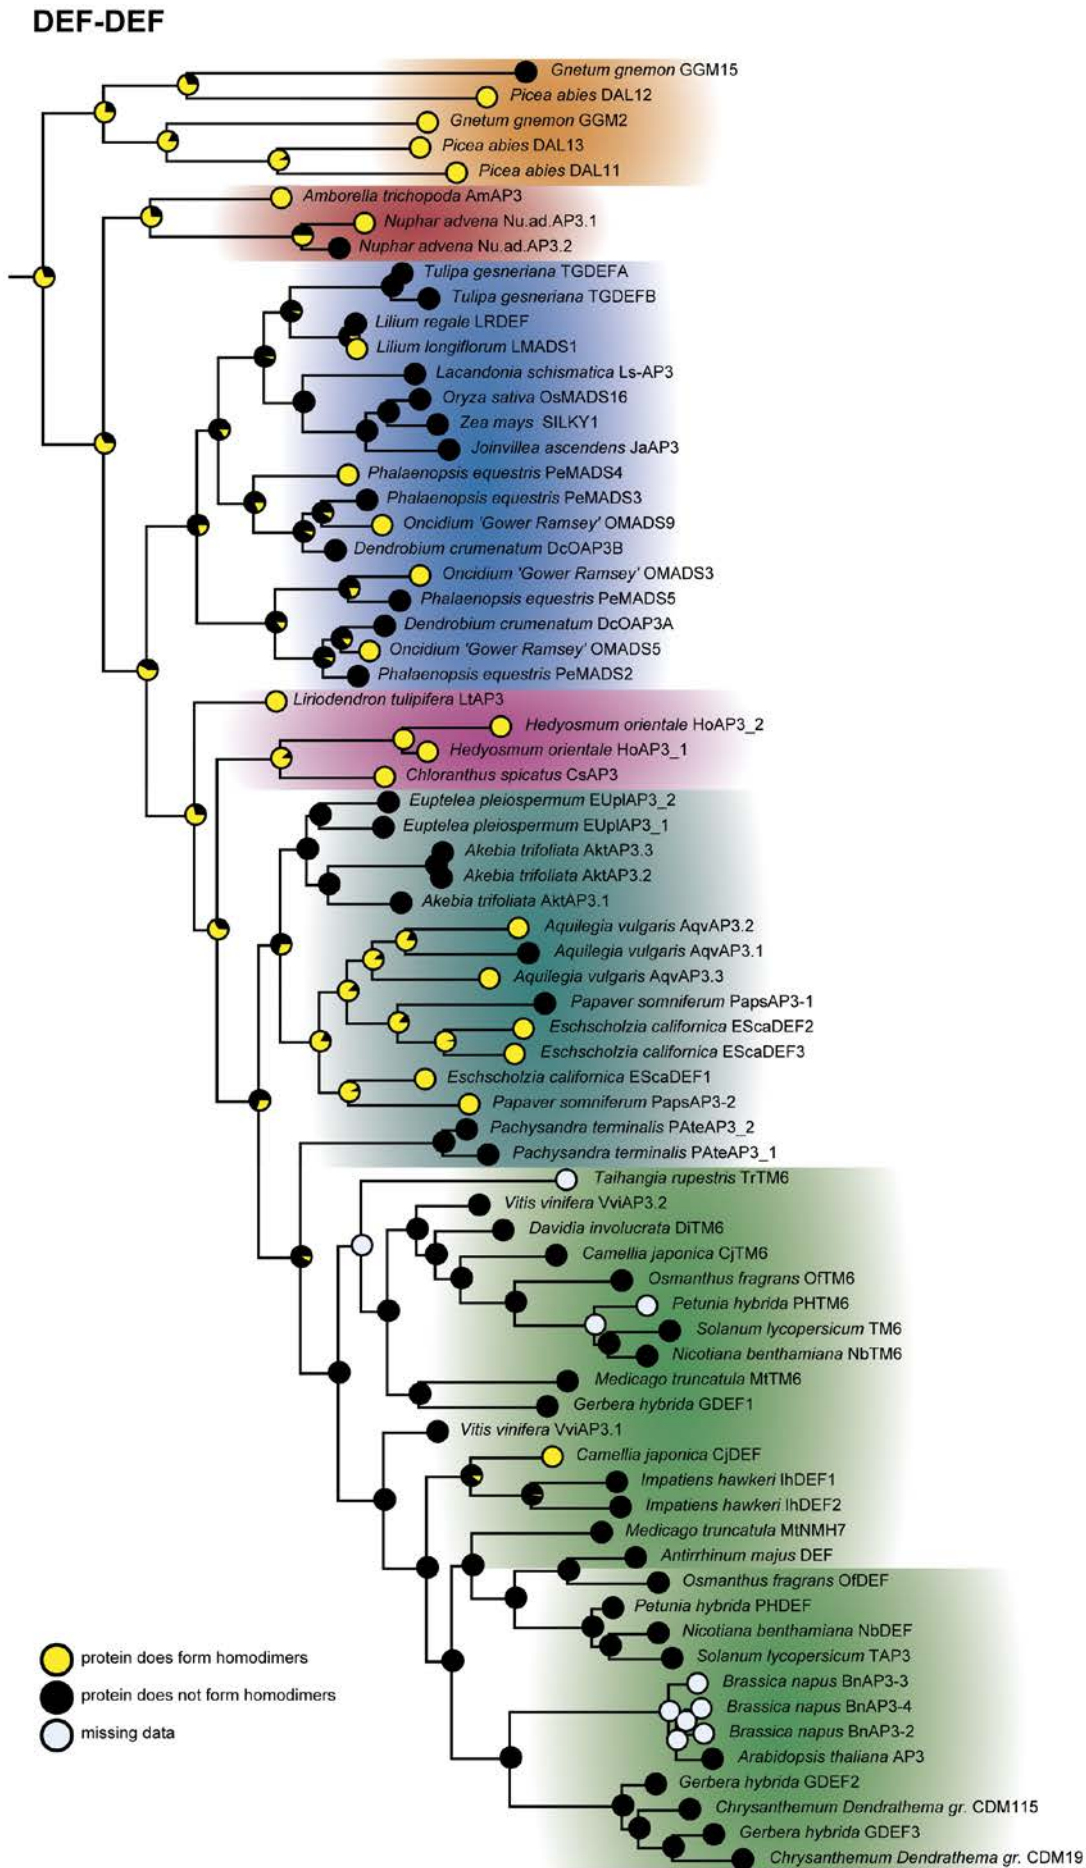

Fig. S3. Heterodimerization of GLO- with DEF-like proteins.

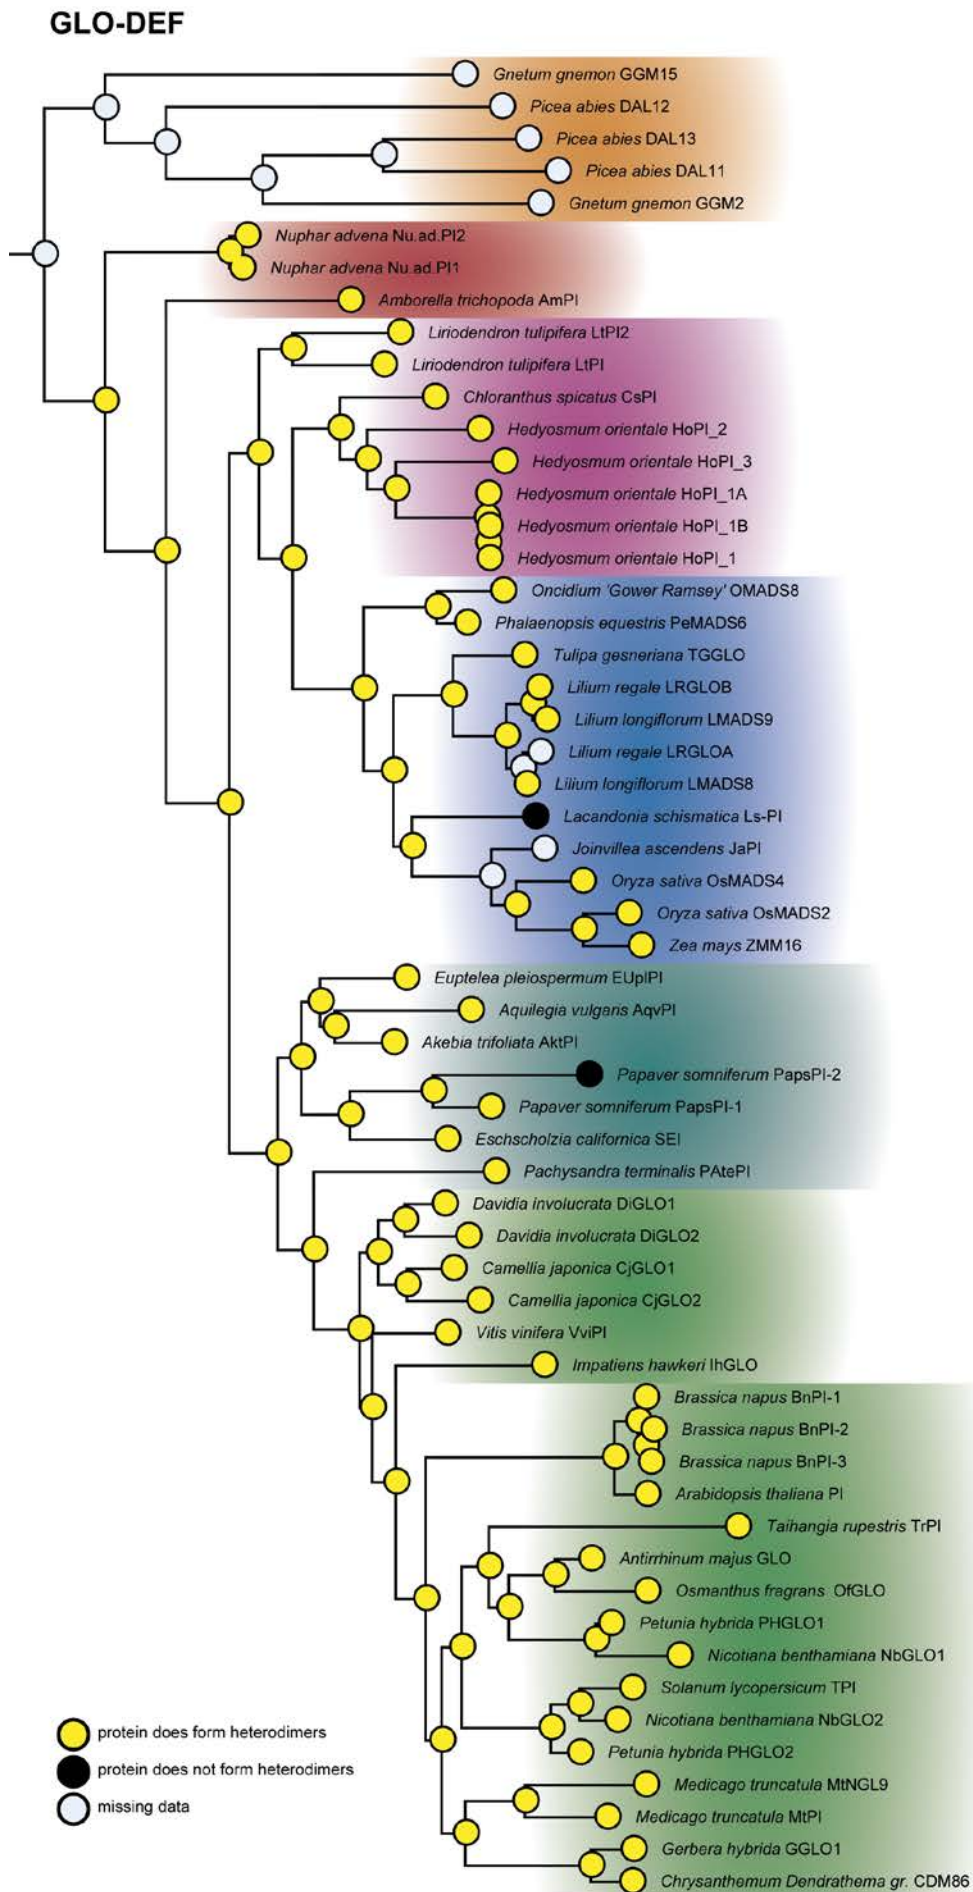



Fig. S4: Homodimerization of GLO-like proteins.

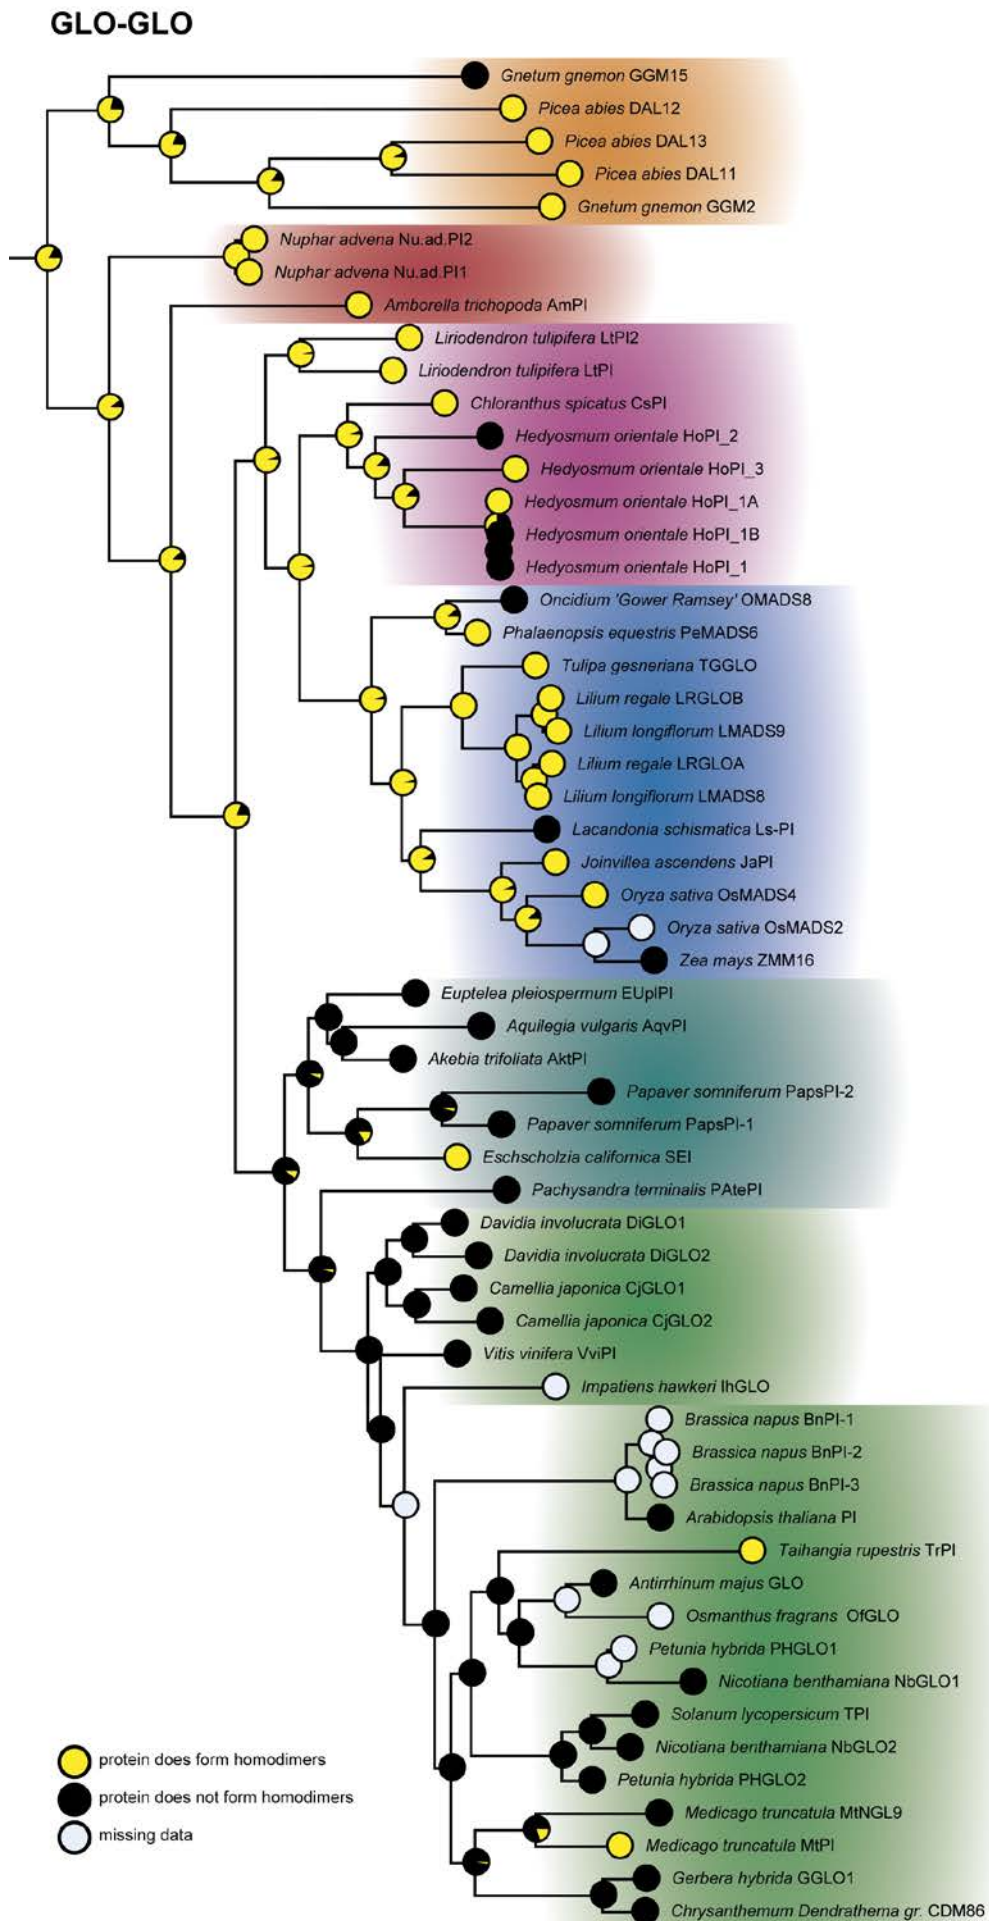

Fig. S5 and S7. Heterodimerization of DEF-like with AGL6/LOFSEP/SEP3-like proteins.  
 Fig. S5:

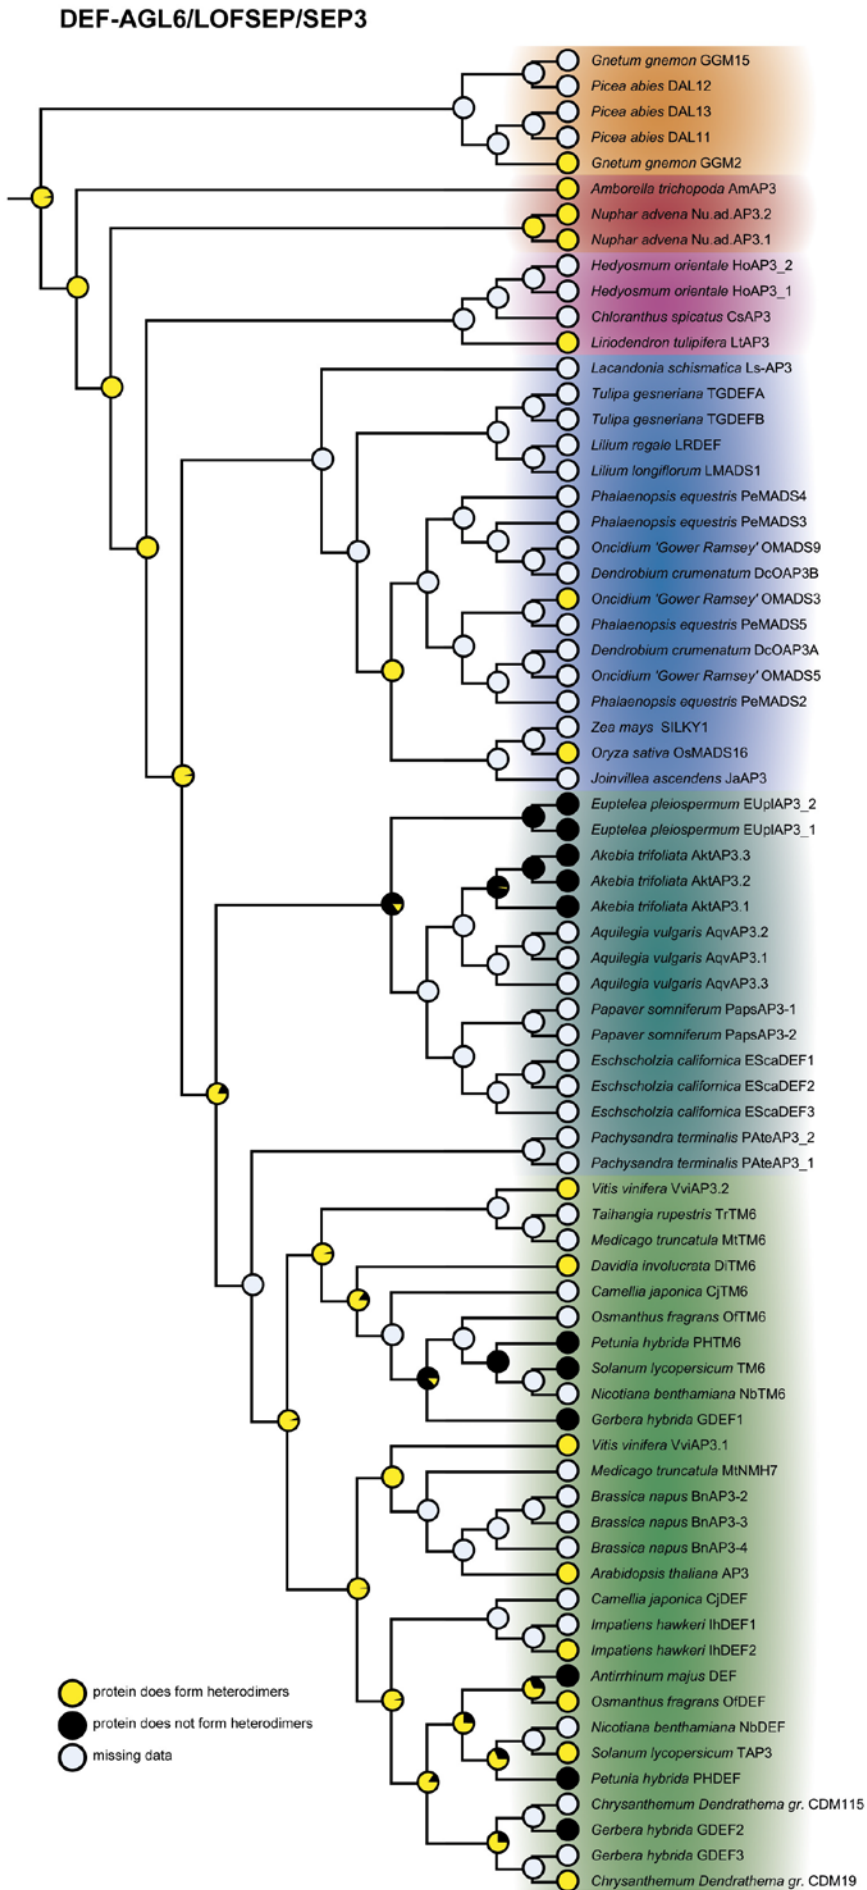

Fig. S5 and S7. Heterodimerization of DEF-like with AGL6/LOFSEP/SEP3-like proteins.  
 Fig. S7:

**DEF-AGL6/LOFSEP/SEP3**

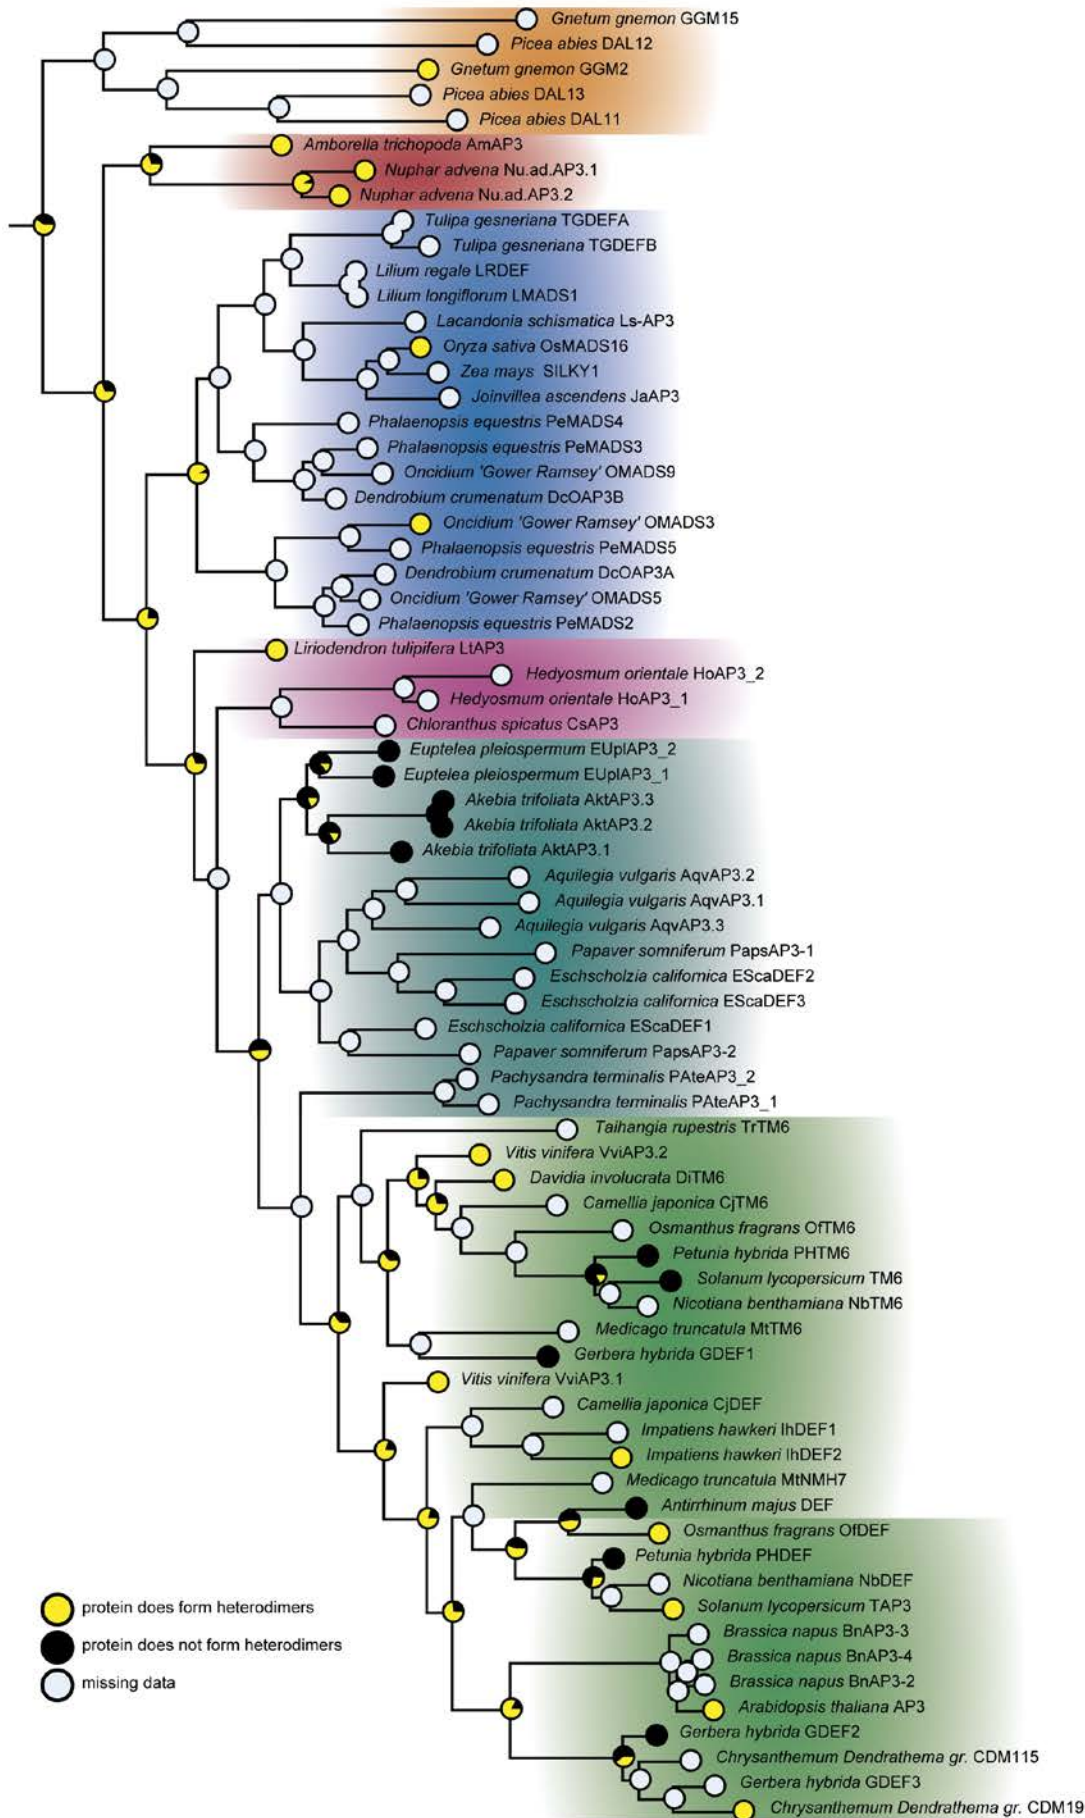



Fig. S6 and S8. Heterodimerization of GLO-like with AGL6/LOFSEP/SEP3-like proteins.  
 Fig. S6:

**GLO-AGL6/LOFSEP/SEP3**

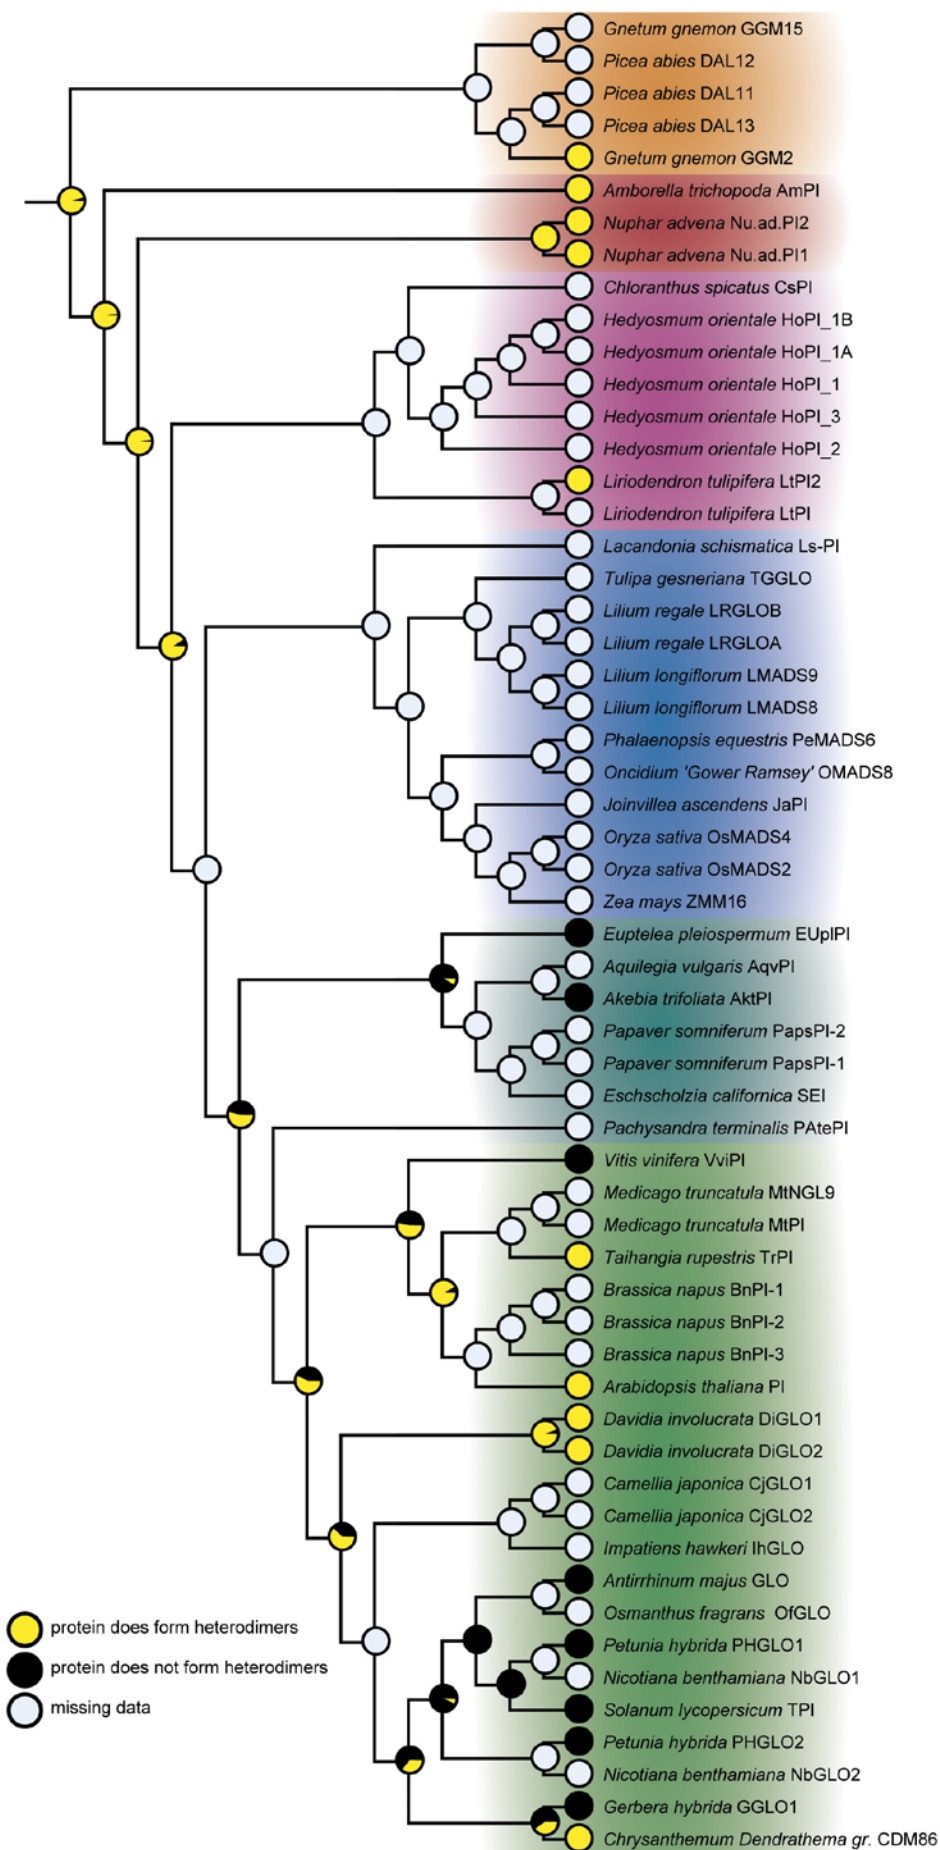

Fig. S6 and S8. Heterodimerization of GLO-like with AGL6/LOFSEP/SEP3-like proteins.  
 Fig. S8:

**GLO-AGL6/LOFSEP/SEP3**

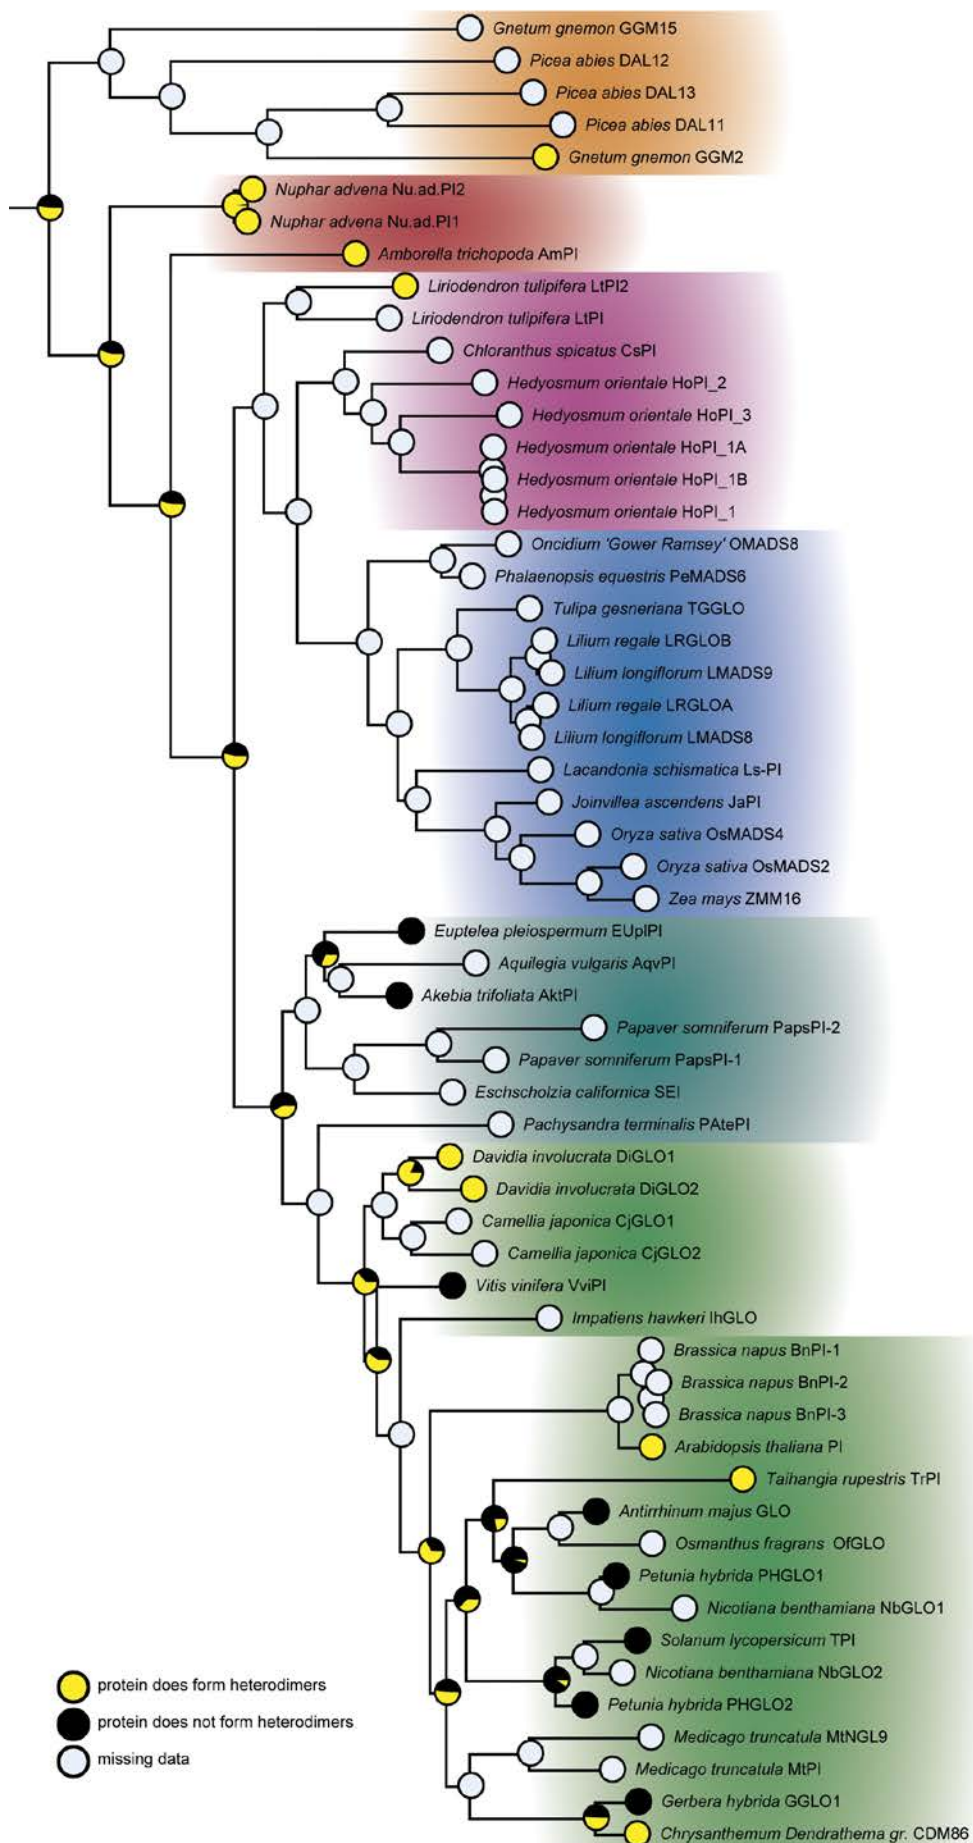



Fig. S9. Homodimerization of DEF-like proteins, comparing yeast two-hybrid (Y2H) and EMSA data.

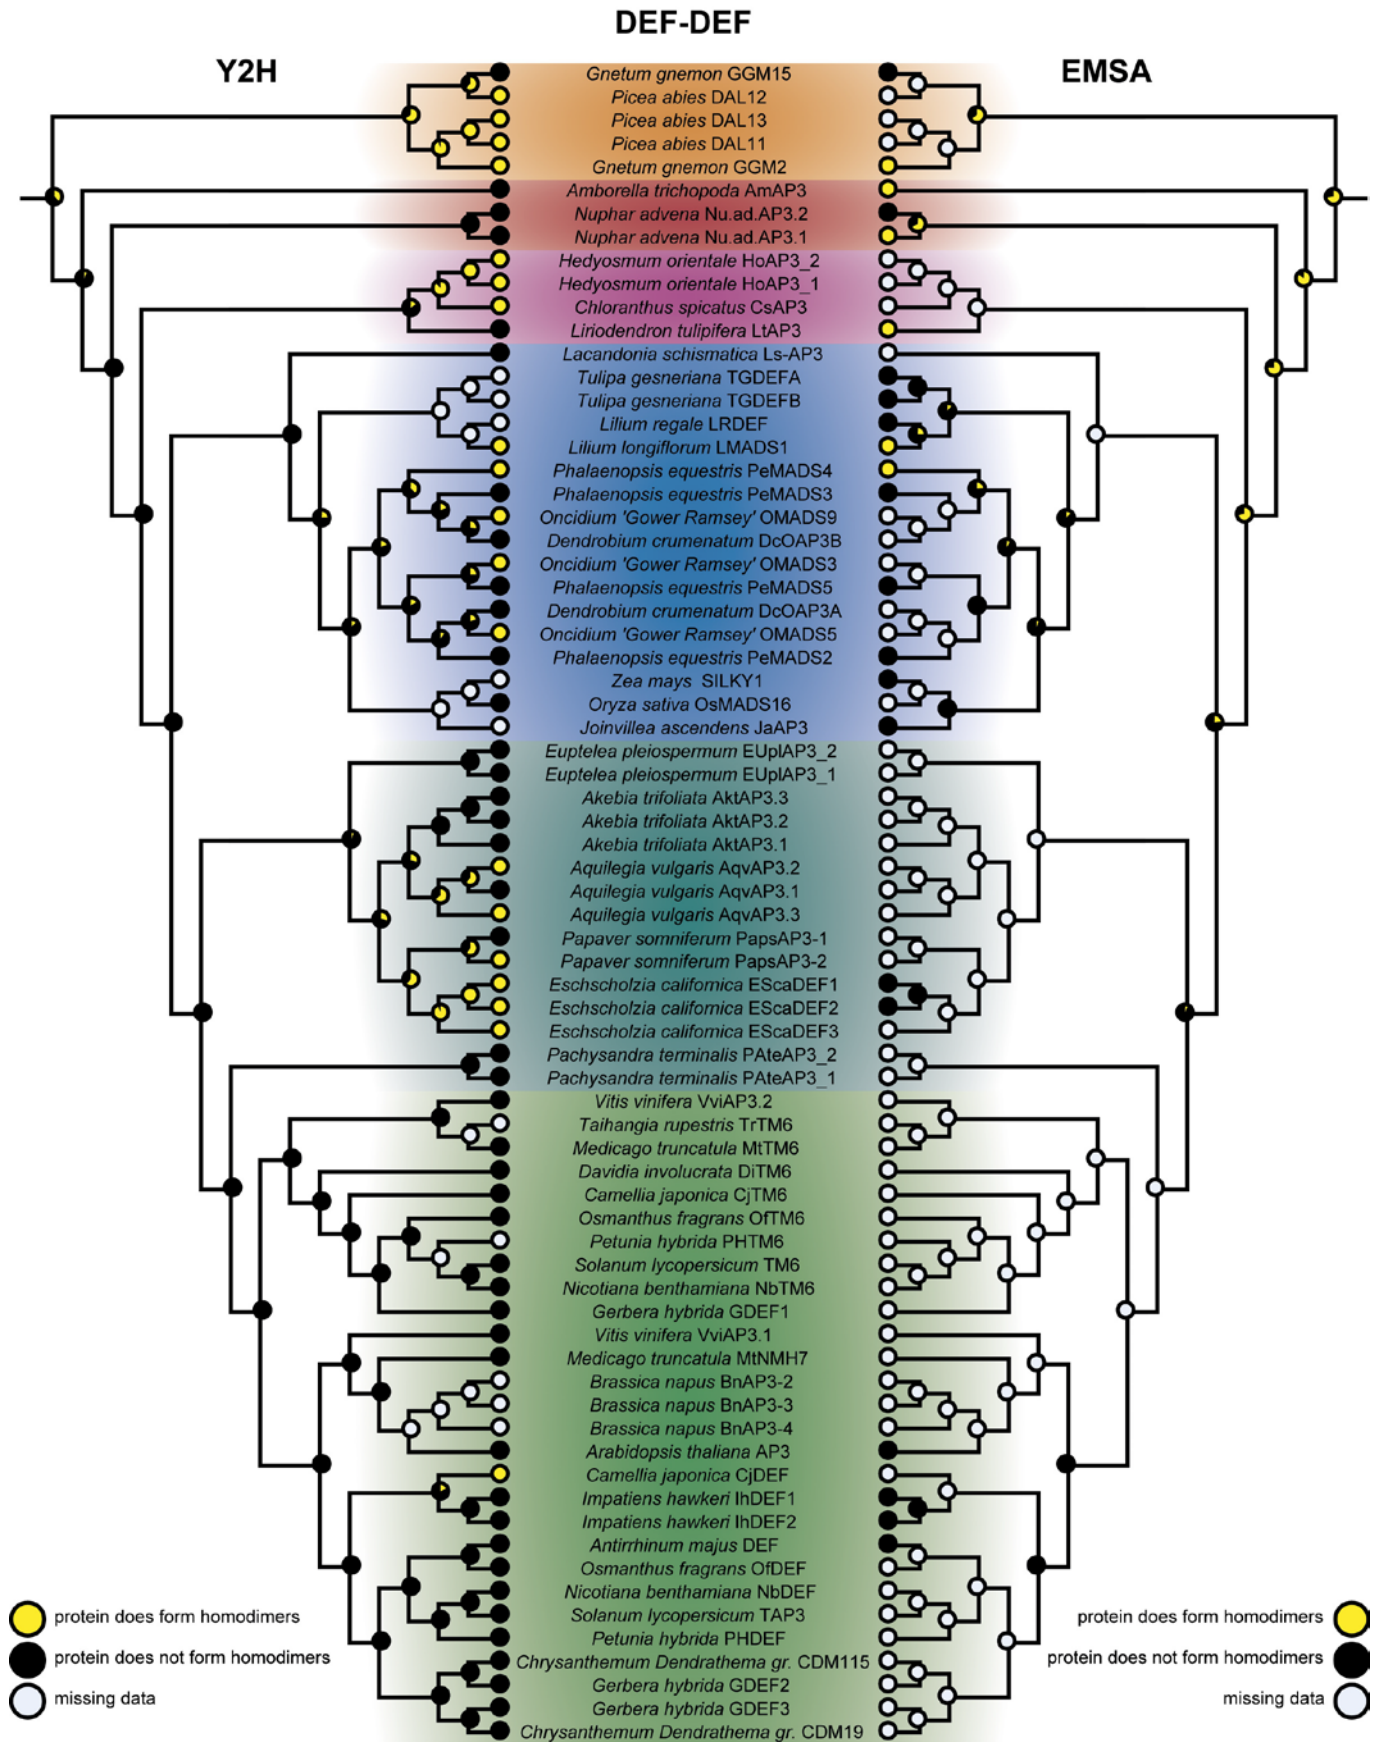

Fig. S10. Heterodimerization of DEF- with GLO-like proteins, comparing Y2H with EMSA data.

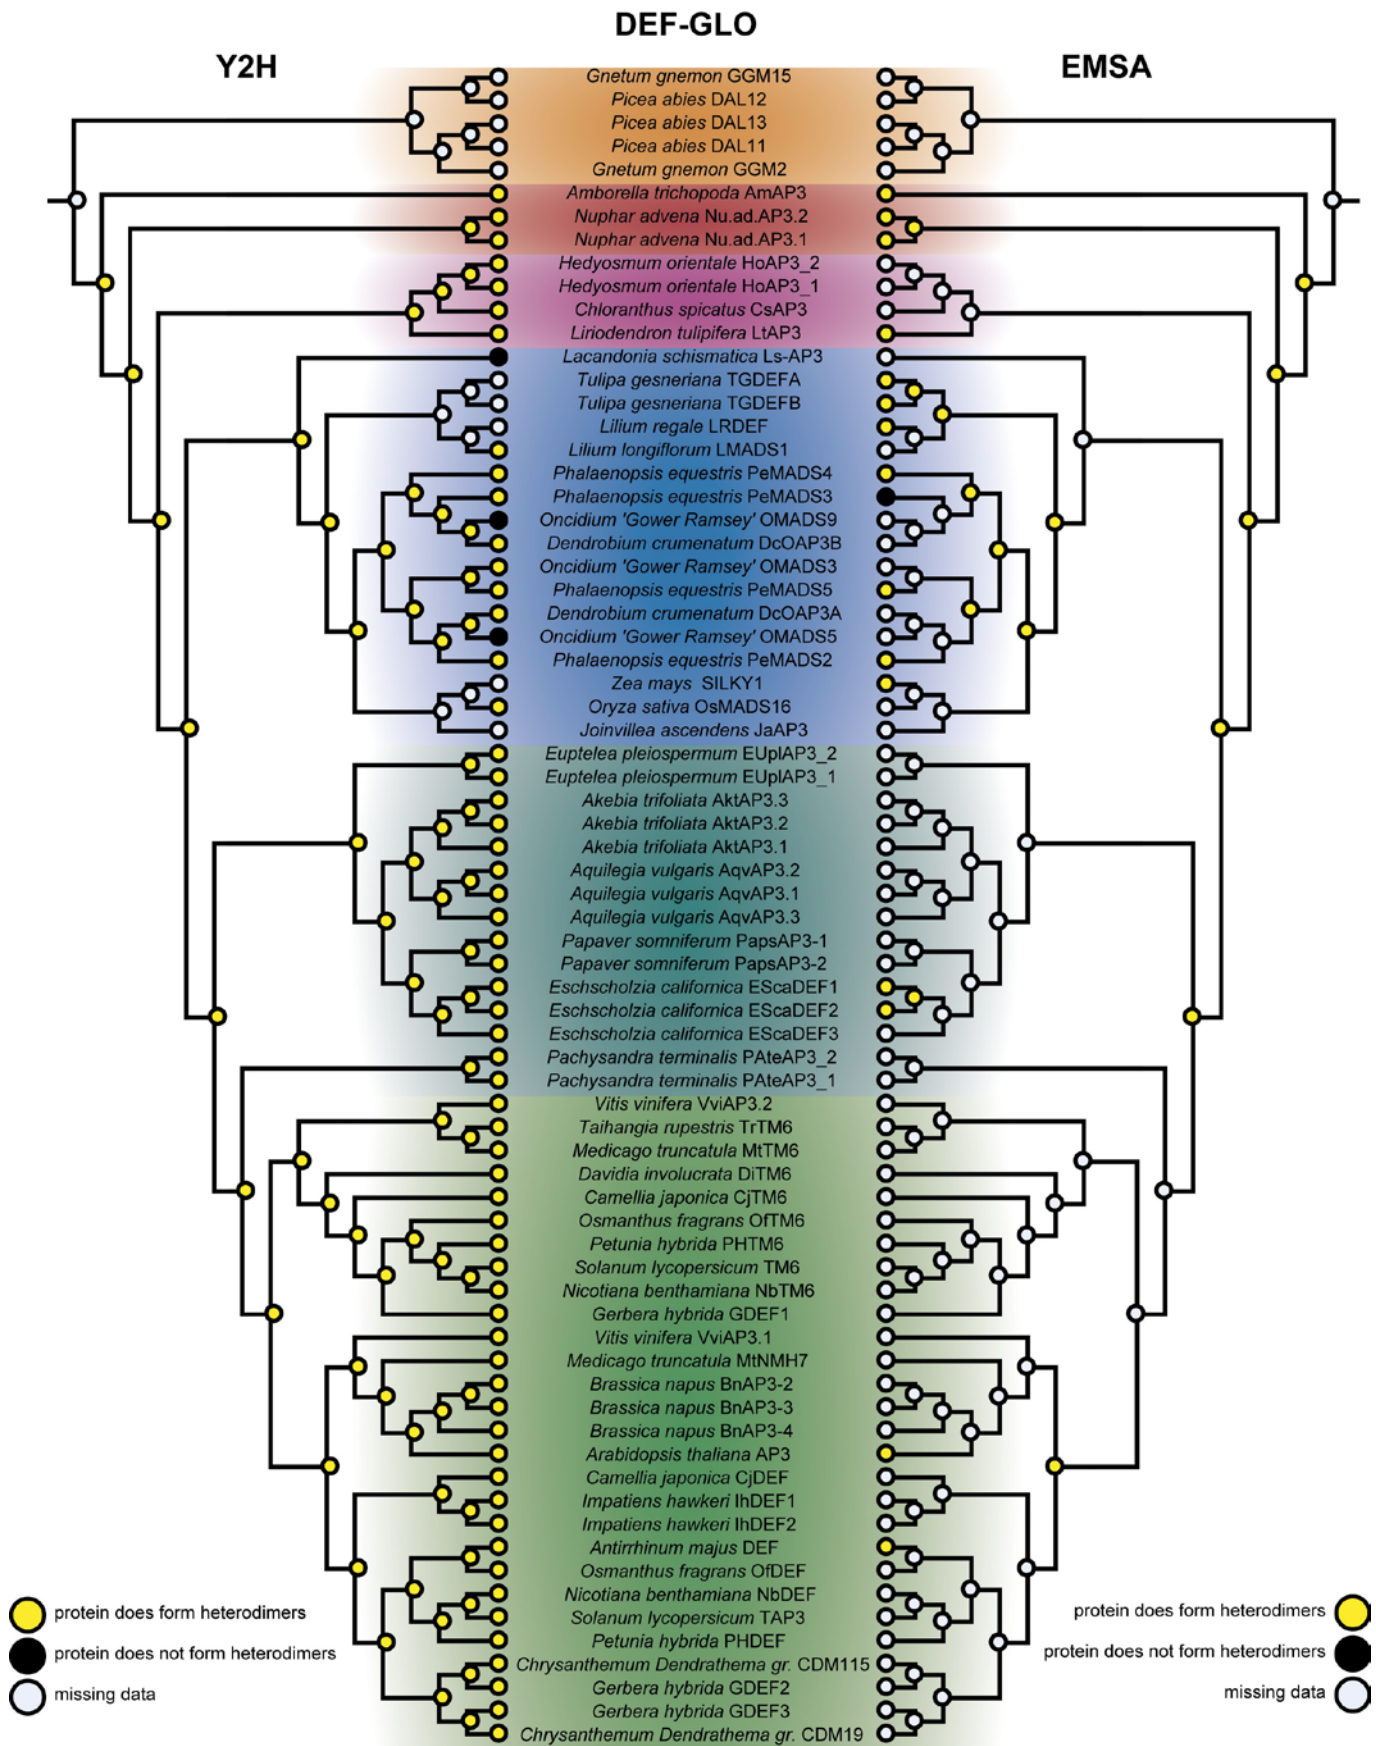

Fig. S11: Homodimerization of GLO-like proteins, comparing Y2H and EMSA data.

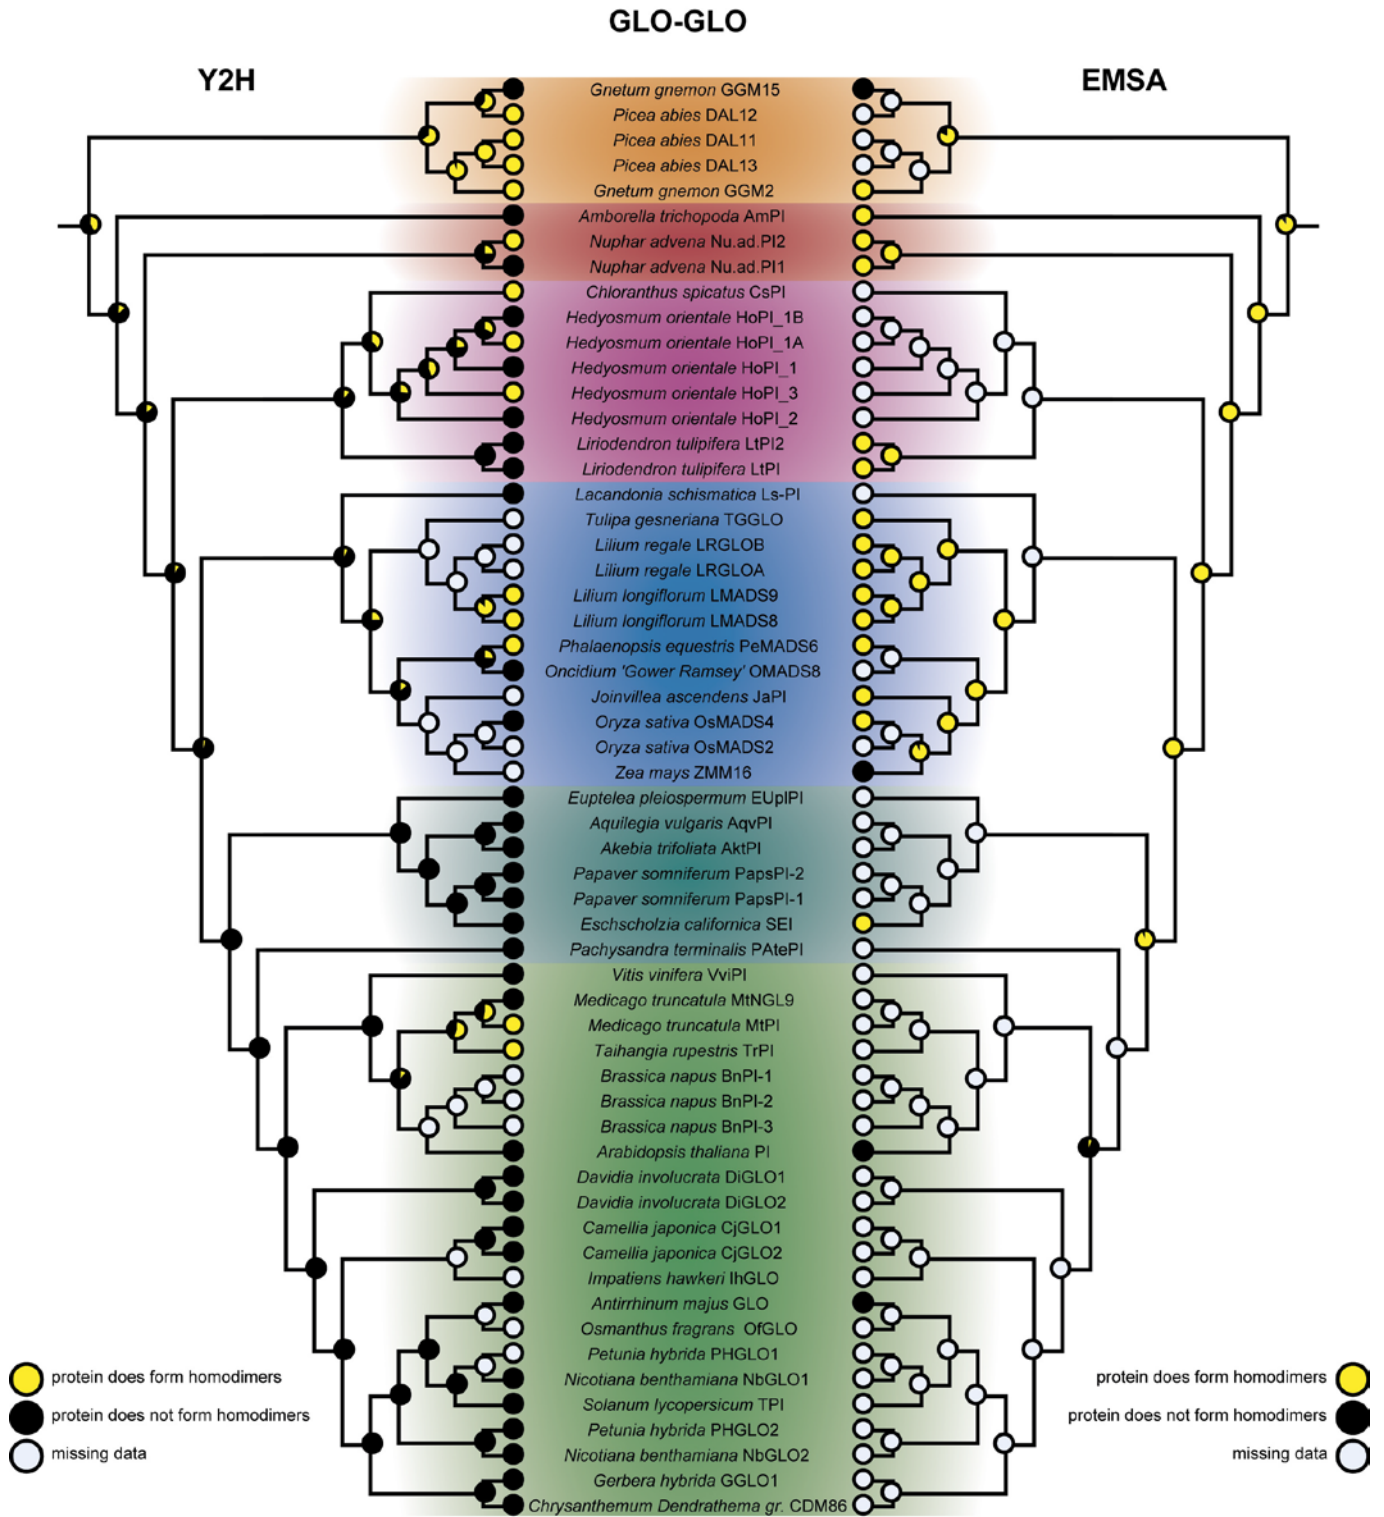



Fig. S12. Heterodimerization of GLO- with DEF-like proteins, comparing Y2H with EMSA data.

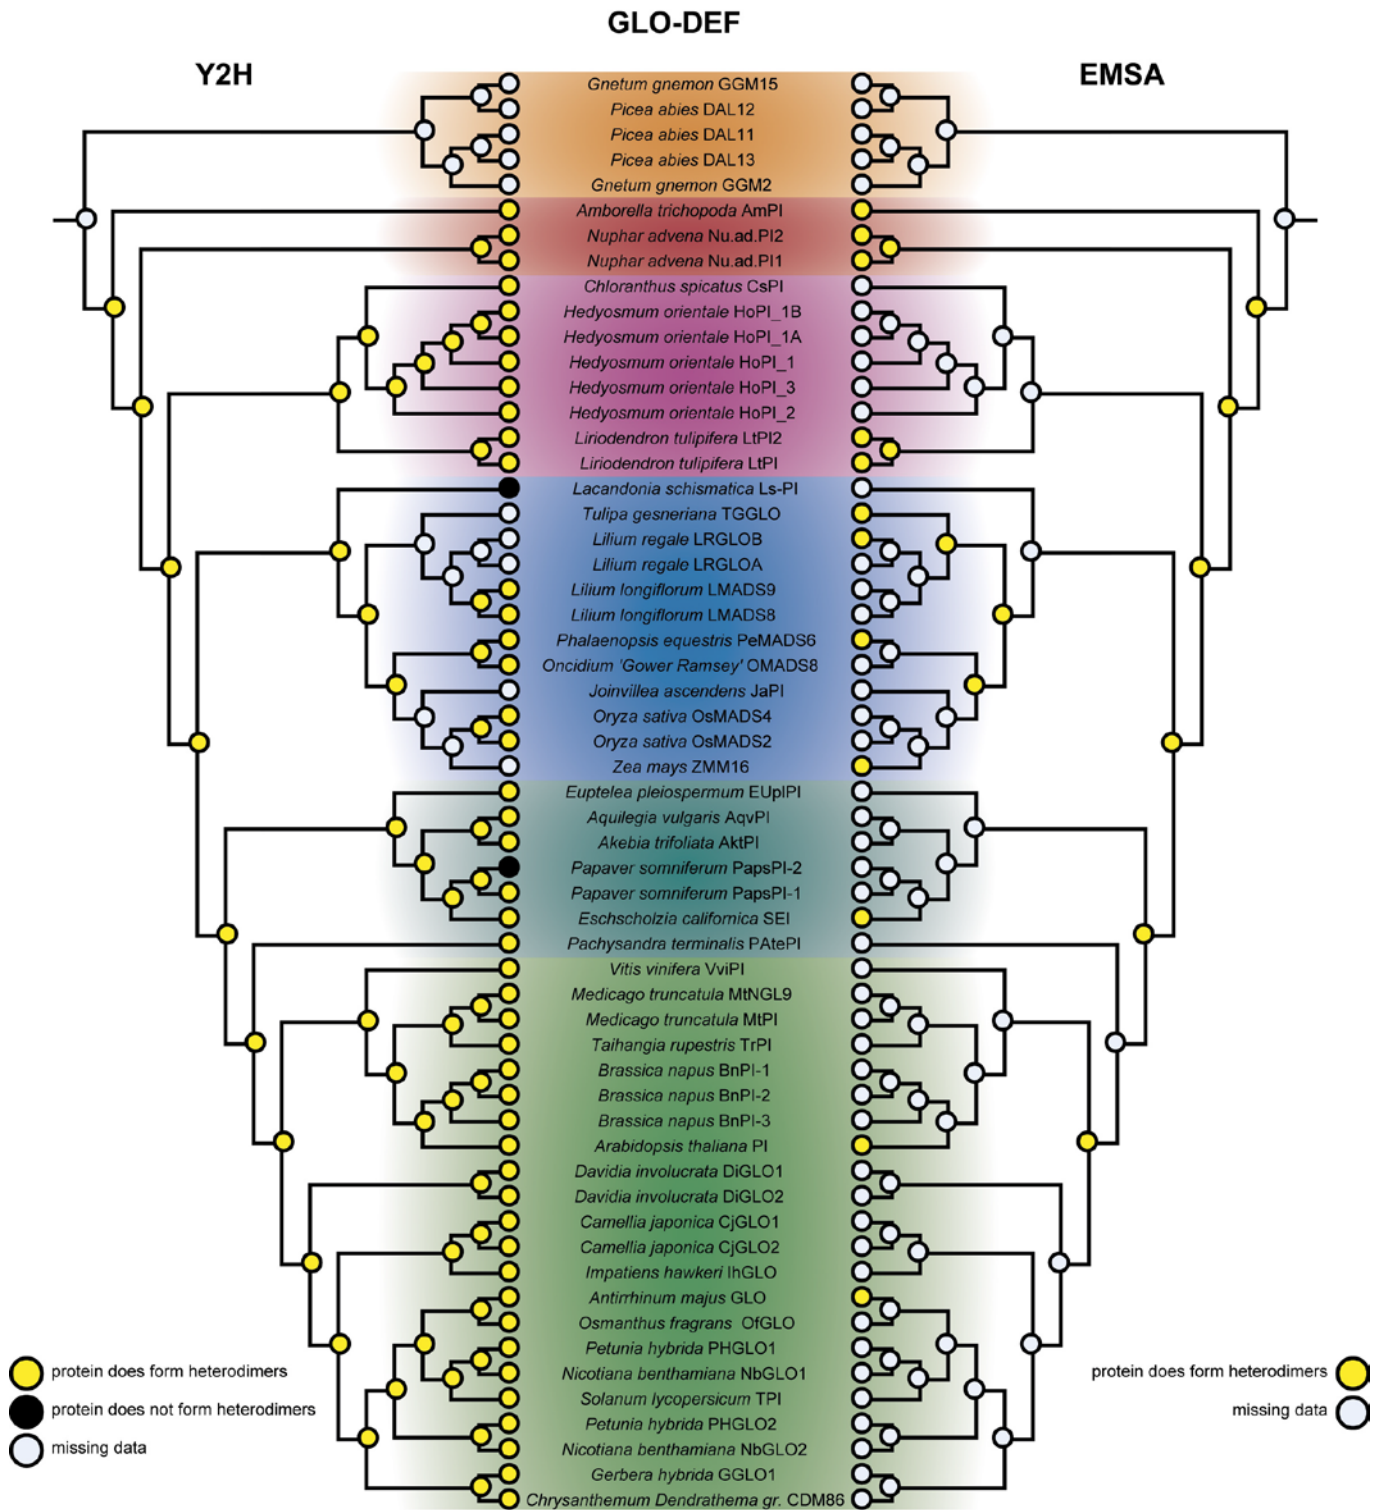

Fig. S13. Representative yeast two-hybrid results for MADS-domain proteins from *L. tulipifera*. For details of the labelling, see Figure 2.

| pGBKT7 \ pGADT7 | DEF-like | GLO-like |       | SEP3-like | Δ |
|-----------------|----------|----------|-------|-----------|---|
|                 | LtAP3    | LtPI     | LtPI2 | LltuAGL9  |   |
| LtAP3           |          |          |       |           |   |
| LtPI            |          |          |       |           |   |
| LtPI2           |          |          |       |           |   |
| LltuAGL9        |          |          |       |           |   |
| Δ               |          |          |       |           |   |

Fig. S14. Representative yeast two-hybrid results for MADS-domain proteins from *N. advena*. For details of the labelling, see Figure 2.

| pGBKT7 \ pGADT7 | DEF-like    |             | GLO-like  |           | AG-like  | AGL6-like    |              | LOFSEP-like | Δ |
|-----------------|-------------|-------------|-----------|-----------|----------|--------------|--------------|-------------|---|
|                 | Nu.ad.AP3.1 | Nu.ad.AP3.2 | Nu.ad.PI1 | Nu.ad.PI2 | Nu.ad.AG | Nu.ad.AGL6.1 | Nu.ad.AGL6.2 | Nu.ad.AGL2  |   |
| Nu.ad.AP3.1     |             |             |           |           |          |              |              |             |   |
| Nu.ad.AP3.2     |             |             |           |           |          |              |              |             |   |
| Nu.ad.PI1       |             |             |           |           |          |              |              |             |   |
| Nu.ad.PI2       |             |             |           |           |          |              |              |             |   |
| Nu.ad.AG        |             |             |           |           |          |              |              |             |   |
| Nu.ad.AGL6.1    |             |             |           |           |          |              |              |             |   |
| Nu.ad.AGL6.2    |             |             |           |           |          |              |              |             |   |
| Nu.ad.AGL2      |             |             |           |           |          |              |              |             |   |
| Δ               |             |             |           |           |          |              |              |             |   |

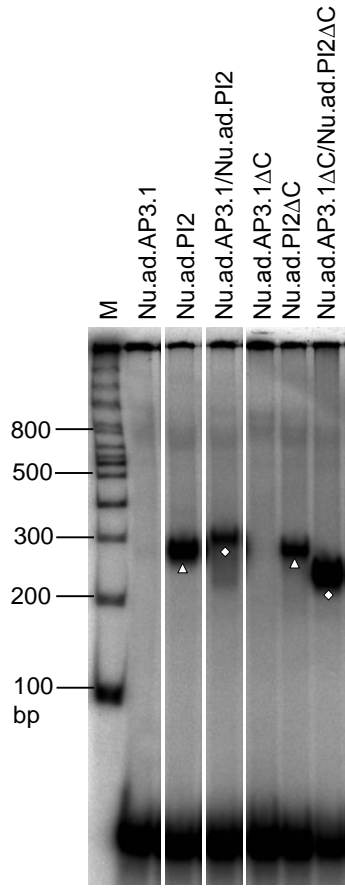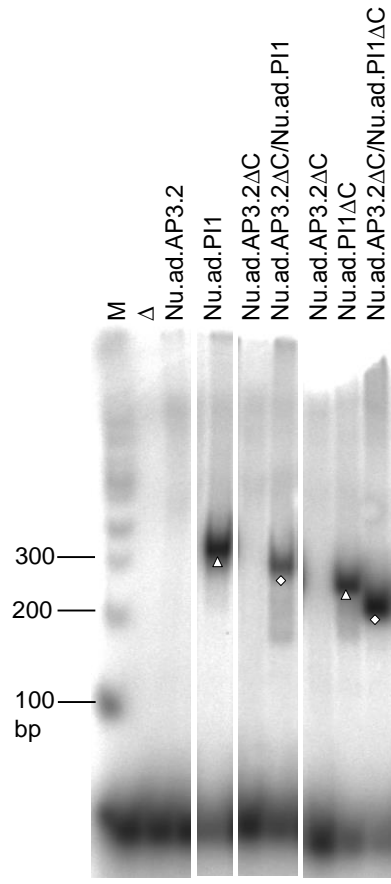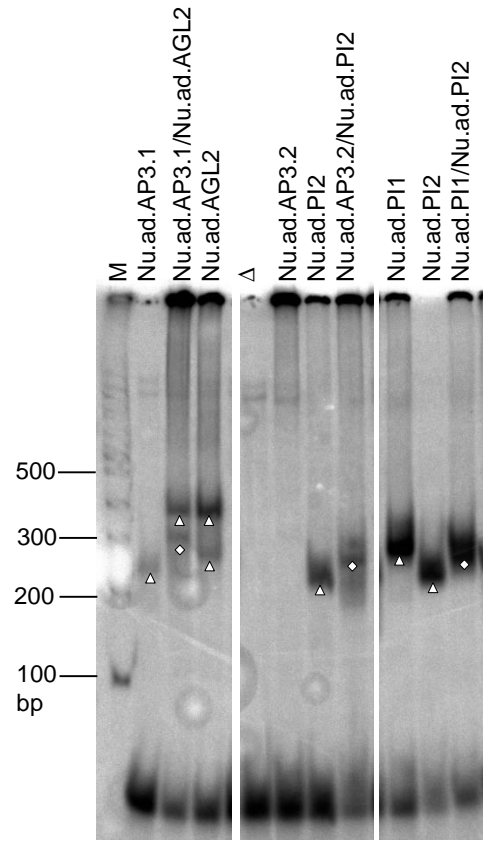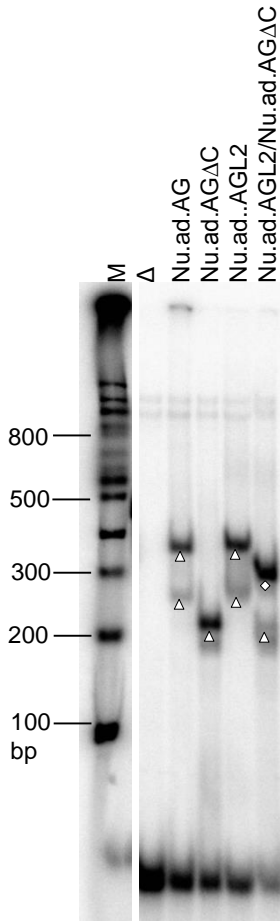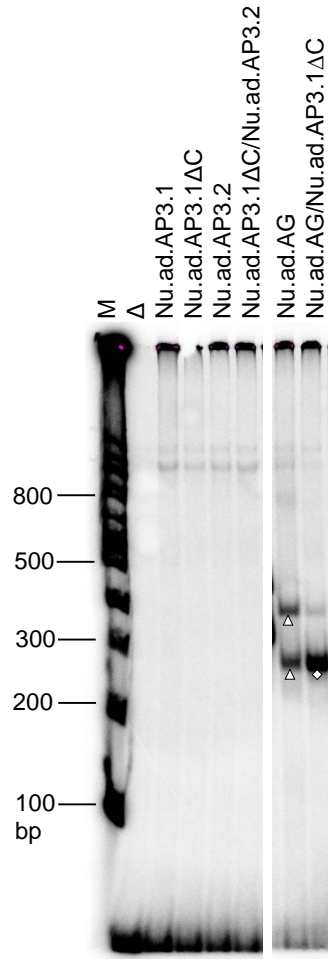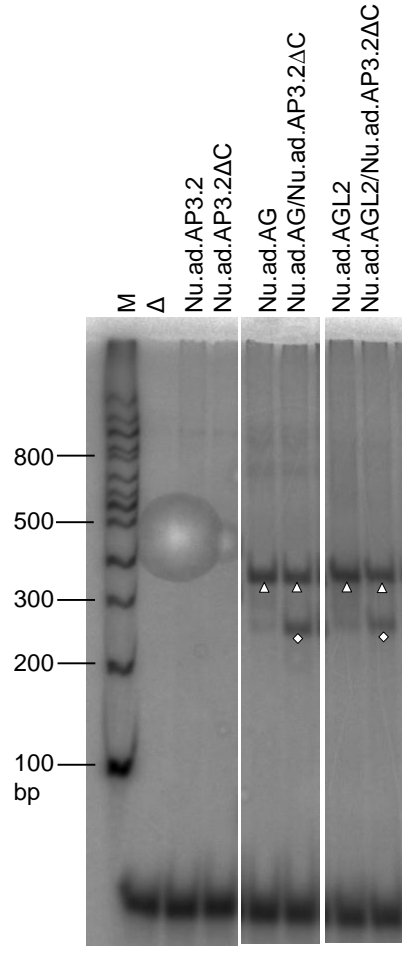



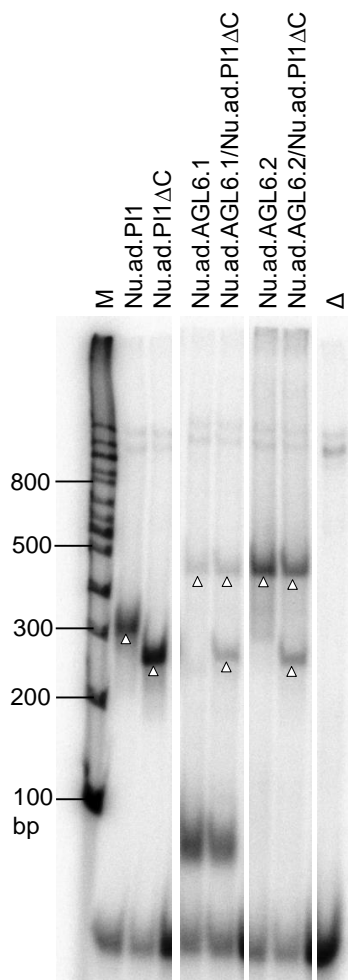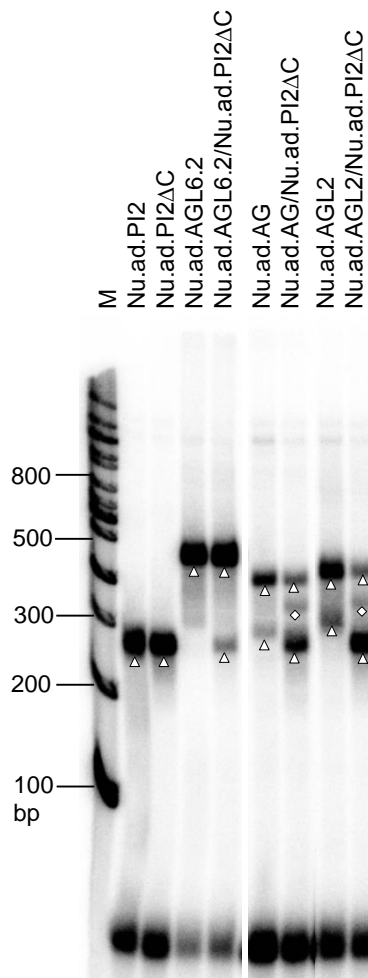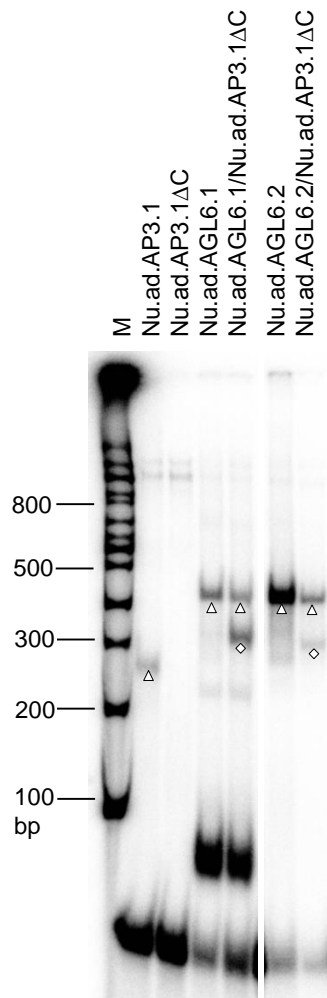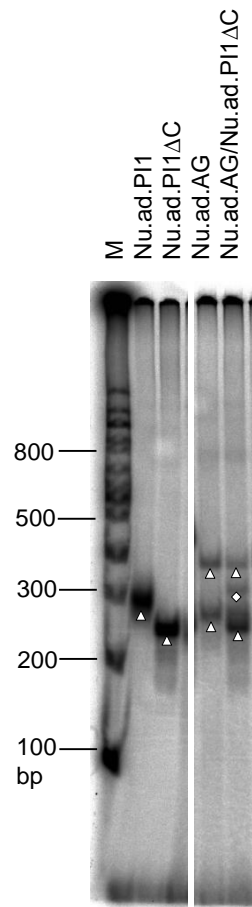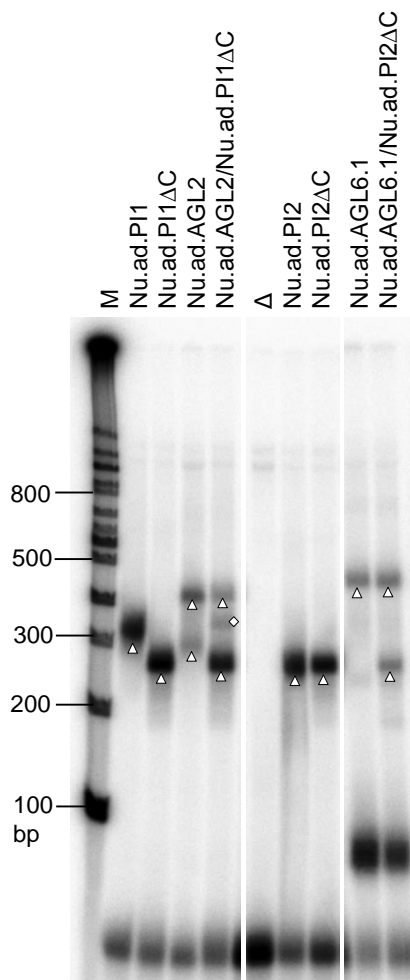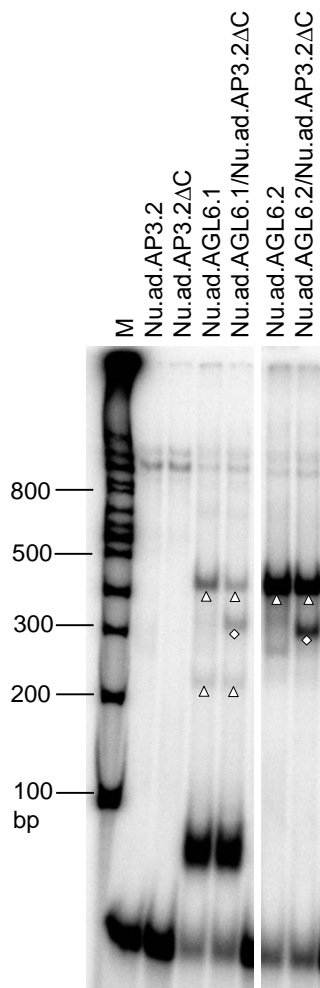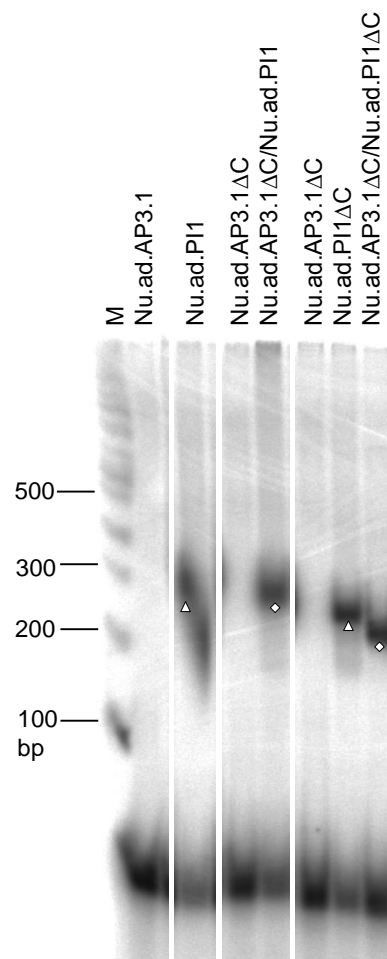

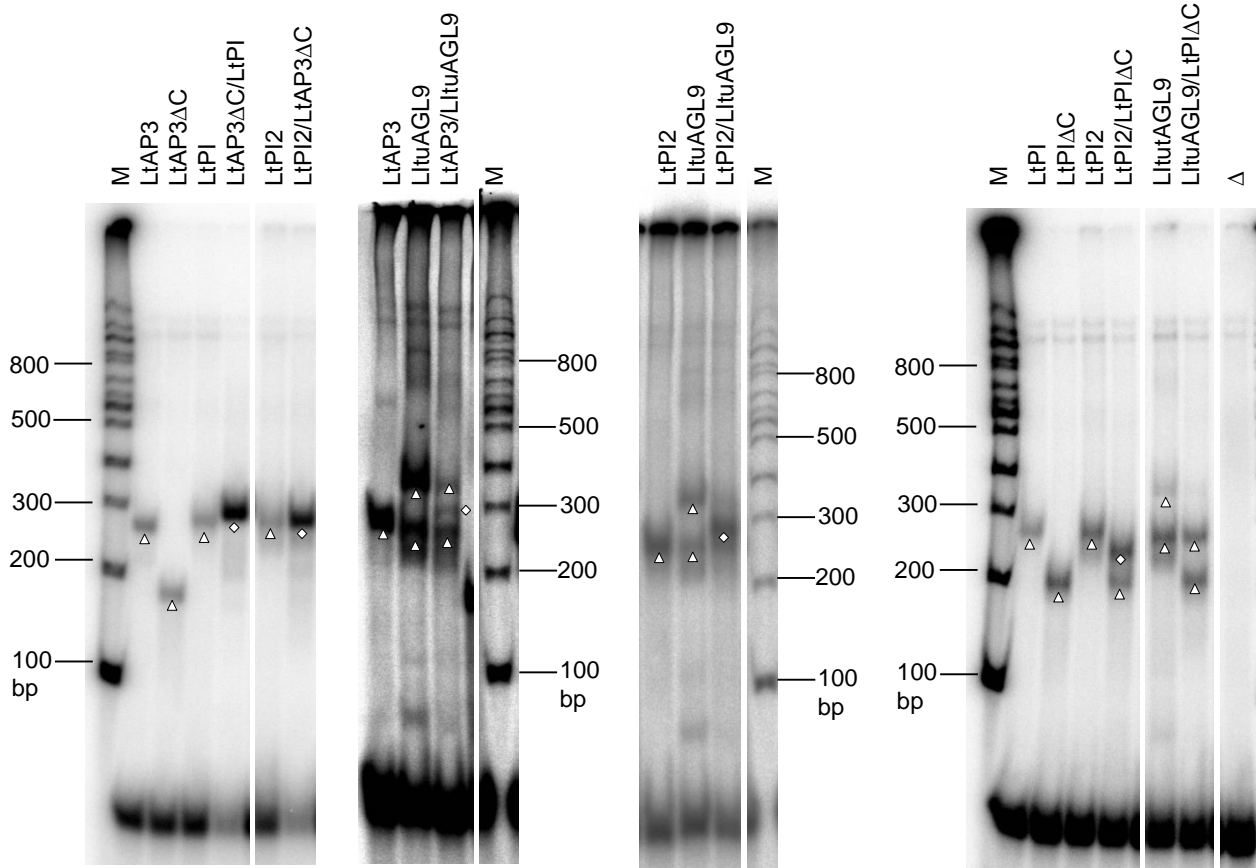

**Supplementary Figure 15:** EMSA results for MADS-domain proteins from *N. advena* and *L. tulipifera*. Band and lane labelling is as in Figure 3. For reasons not entirely clear, some heteromeric complexes have an reduced electrophoretic mobility when compared to each of the corresponding homomeric complexes (compare LtAP3ΔC and LtPI with LtAP3ΔC/LtPI, for example). Also for reasons not clear, Nu.ad.PI2- and Nu.ad.PI2ΔC-DNA complexes have almost identical electrophoretic mobilities. Beyond the expected homomeric protein-DNA complex, an additional band of very high electrophoretic mobility was resolved for Nu.ad.AGL6.1; the nature of this band is unknown.
