# Supplementary material
Source: PubMed Central journal article supplement (PMC4204782)
Supplement: supp_mcu094_mcu094supp_tables.pdf [file supp_mcu094_mcu094supp_tables.pdf]

## SUPPLEMENTARY DATA

Table S1. List of genes used in this study.

| <u>Gymnosperm orthologs of DEF/GLO-like genes</u> | Accession number |
|---------------------------------------------------|------------------|
| <i>Gnetum gnemon</i> GGM15                        | AJ251555.1       |
| <i>Gnetum gnemon</i> GGM2                         | AJ132208.1       |
| <i>Picea abies</i> DAL11                          | AF158540.1       |
| <i>Picea abies</i> DAL12                          | AF158542.1       |
| <i>Picea abies</i> DAL13                          | AF158544.1       |
| <br>                                              |                  |
| <u>DEF-like genes</u>                             |                  |
| <i>Akebia trifoliata</i> AktAP3.1                 | AY627630.1       |
| <i>Akebia trifoliata</i> AktAP3.2                 | AY627631.1       |
| <i>Akebia trifoliata</i> AktAP3.3                 | DQ303124.1       |
| <i>Amborella trichopoda</i> AmAP3                 | AB154845.1       |
| <i>Antirrhinum majus</i> DEF                      | AB516402.1       |
| <i>Aquilegia vulgaris</i> AqvAP3.1                | EF489478.1       |
| <i>Aquilegia vulgaris</i> AqvAP3.2                | EF489477.1       |
| <i>Aquilegia vulgaris</i> AqvAP3.3                | EF489476.1       |
| <i>Arabidopsis thaliana</i> AP3                   | NM_115294.5      |
| <i>Brassica napus</i> BnAP3-2                     | AY313941.1       |
| <i>Brassica napus</i> BnAP3-3                     | DQ372719.1       |
| <i>Brassica napus</i> BnAP3-4                     | DQ372720.1       |
| <i>Camellia japonica</i> CjDEF                    | GQ141181.1       |
| <i>Camellia japonica</i> CjTM6                    | GQ141161.1       |
| <i>Chloranthus spicatus</i> CsAP3                 | AY397762.1       |
| <i>Chrysanthemum Dendrathera</i> gr. CDM115       | AY173060.1       |
| <i>Chrysanthemum Dendrathera</i> gr. CDM19        | AY173064.1       |
| <i>Davidia involucreta</i> DiTM6                  | GQ141153.1       |
| <i>Dendrobium crumenatum</i> DcOAP3A              | DQ119838.1       |
| <i>Dendrobium crumenatum</i> DcOAP3B              | DQ119839.1       |
| <i>Eschscholzia californica</i> EScaDEF1          | EF378697.1       |
| <i>Eschscholzia californica</i> EScaDEF2          | EF378698.1       |
| <i>Eschscholzia californica</i> EScaDEF3          | HE573239.1       |
| <i>Euptelea pleiospermum</i> EUplAP3_1            | GU357449.1       |
| <i>Euptelea pleiospermum</i> EUplAP3_2            | GU357450.1       |
| <i>Gerbera hybrida</i> GDEF1                      | AJ009724.1       |
| <i>Gerbera hybrida</i> GDEF2                      | AJ009725.1       |
| <i>Gerbera hybrida</i> GDEF3                      | FJ817421.1       |
| <i>Hedyosmum orientale</i> HoAP3_1                | JX069759.1       |
| <i>Hedyosmum orientale</i> HoAP3_2                | JX069760.1       |
| <i>Impatiens hawkeri</i> IhDEF1                   | DQ493930.1       |
| <i>Impatiens hawkeri</i> IhDEF2                   | DQ493929.1       |
| <i>Joinvillea ascendens</i> JaAP3                 | DQ662238.1       |
| <i>Lacandonia schismatica</i> Ls-AP3              | GQ214161.1       |
| <i>Lilium longiflorum</i> LMADS1                  | AF503913.1       |
| <i>Lilium regale</i> LRDEF                        | AB071378.1       |

---

|                                         |                |
|-----------------------------------------|----------------|
| <i>Liriodendron tulipifera</i> LtAP3    | KF925492       |
| <i>Medicago truncatula</i> MtNMH7       | JN412096.1     |
| <i>Medicago truncatula</i> MtTM6        | JN412097.1     |
| <i>Nicotiana benthamiana</i> NbDEF      | DQ437635.1     |
| <i>Nicotiana benthamiana</i> NbTM6      | AY577817.1     |
| <i>Nuphar advena</i> Nu.ad.AP3.1        | KF925495       |
| <i>Nuphar advena</i> Nu.ad.AP3.2        | KF925496       |
| <i>Oncidium 'Gower Ramsey'</i> OMADS3   | AY196350.1     |
| <i>Oncidium 'Gower Ramsey'</i> OMADS5   | HM140840.1     |
| <i>Oncidium 'Gower Ramsey'</i> OMADS9   | HM140841.1     |
| <i>Oryza sativa</i> OsMADS16            | AF077760.1     |
| <i>Osmanthus fragrans</i> OfDEF         | HQ853400.1     |
| <i>Osmanthus fragrans</i> OfTM6         | HQ853429.1     |
| <i>Pachysandra terminalis</i> PAteAP3_1 | GU357454.1     |
| <i>Pachysandra terminalis</i> PAteAP3_2 | GU357462.1     |
| <i>Papaver somniferum</i> PapsAP3-1     | EF071993.1     |
| <i>Papaver somniferum</i> PapsAP3-2     | EF071992.1     |
| <i>Petunia hybrida</i> PHDEF            | X69946.1       |
| <i>Petunia hybrida</i> PHTM6            | AF230704.1     |
| <i>Phalaenopsis equestris</i> PeMADS2   | AY378149.1     |
| <i>Phalaenopsis equestris</i> PeMADS3   | AY378150.1     |
| <i>Phalaenopsis equestris</i> PeMADS4   | AY378147.1     |
| <i>Phalaenopsis equestris</i> PeMADS5   | AY378148.1     |
| <i>Solanum lycopersicum</i> TAP3        | NM_001247148.1 |
| <i>Solanum lycopersicum</i> TM6         | XM_004232405.1 |
| <i>Taihangia rupestris</i> TrTM6        | DQ248946.1     |
| <i>Tulipa gesneriana</i> TGDEFA         | AB094965.1     |
| <i>Tulipa gesneriana</i> TGDEFB         | AB094966.1     |
| <i>Vitis vinifera</i> VviAP3.1          | EF418603.1     |
| <i>Vitis vinifera</i> VviAP3.2          | NM_001281008.1 |
| <i>Zea mays</i> SILKY1                  | NM_001111481.1 |

GLO-like genes

|                                             |             |
|---------------------------------------------|-------------|
| <i>Akebia trifoliata</i> AktPI              | AY627634.1  |
| <i>Amborella trichopoda</i> AmPI            | AB154842.1  |
| <i>Antirrhinum majus</i> GLO                | AB516403.1  |
| <i>Aquilegia vulgaris</i> AqvPI             | EF489475.1  |
| <i>Arabidopsis thaliana</i> PI              | NM_122031.3 |
| <i>Brassica napus</i> BnPI-1                | EU159431.1  |
| <i>Brassica napus</i> BnPI-2                | EU159432.1  |
| <i>Brassica napus</i> BnPI-3                | EU159433.1  |
| <i>Camellia japonica</i> CjGLO1             | GQ141126.1  |
| <i>Camellia japonica</i> CjGLO2             | GQ141138.   |
| <i>Chloranthus spicatus</i> CsPI            | AF230710.1  |
| <i>Chrysanthemum Dendratherma</i> gr. CDM86 | AY173061.1  |
| <i>Davidia involucrata</i> DiGLO1           | GQ141110.1  |
| <i>Davidia involucrata</i> DiGLO2           | GQ141108.1  |
| <i>Eschscholzia californica</i> SEI         | EF378699.1  |

---

---

|                                       |                |
|---------------------------------------|----------------|
| <i>Euptelea pleiospermum</i> EUplPI   | GU357451.1     |
| <i>Gerbera hybrida</i> GGLO1          | AJ009726.1     |
| <i>Hedyosmum orientale</i> HoPI_1     | JX069754.1     |
| <i>Hedyosmum orientale</i> HoPI_1A    | JX069755.1     |
| <i>Hedyosmum orientale</i> HoPI_1B    | JX069756.1     |
| <i>Hedyosmum orientale</i> HoPI_2     | JX069757.1     |
| <i>Hedyosmum orientale</i> HoPI_3     | JX069758.1     |
| <i>Impatiens hawkeri</i> IhGLO        | DQ493931.1     |
| <i>Joinvillea ascendens</i> JaPI      | DQ662245.1     |
| <i>Lacandonia schismatica</i> Ls-PI   | GQ214162.1     |
| <i>Lilium longiflorum</i> LMADS8      | HQ698550.1     |
| <i>Lilium longiflorum</i> LMADS9      | HQ698551.1     |
| <i>Lilium regale</i> LRGLOA           | AB071379.1     |
| <i>Lilium regale</i> LRGLOB           | AB071380.1     |
| <i>Liriodendron tulipifera</i> Lt PI  | KF925493       |
| <i>Liriodendron tulipifera</i> Lt PI2 | KF925494       |
| <i>Medicago truncatula</i> MtNGL9     | FJ403469.1     |
| <i>Medicago truncatula</i> MtPI       | FJ403468.1     |
| <i>Nicotiana benthamiana</i> NbGLO1   | HQ005417.1     |
| <i>Nicotiana benthamiana</i> NbGLO2   | HQ005418.1     |
| <i>Nuphar advena</i> Nu.ad.PI1        | KF925497       |
| <i>Nuphar advena</i> Nu.ad.PI2        | KF925498       |
| <i>Oncidium 'Gower Ramsey'</i> OMADS8 | HM140842.1     |
| <i>Oryza sativa</i> OsMADS2           | L37526.1       |
| <i>Oryza sativa</i> OsMADS4           | L37527.1       |
| <i>Osmanthus fragrans</i> OfGLO       | HQ853419.1     |
| <i>Pachysandra terminales</i> PAtePI  | GU357455.1     |
| <i>Papaver somniferum</i> PapsPI-1    | EF071994.1     |
| <i>Papaver somniferum</i> PapsPI-2    | EF071995.1     |
| <i>Petunia hybrida</i> PHGLO1         | M91190.1       |
| <i>Petunia hybrida</i> PHGLO2         | X69947.1       |
| <i>Phalaenopsis equestris</i> PeMADS6 | AY678299.1     |
| <i>Solanum lycopersicum</i> TPI       | NM_001247146.1 |
| <i>Taihangia rupestris</i> TrPI       | DQ248947.1     |
| <i>Tulipa gesneriana</i> TGGLO        | AB094967.1     |
| <i>Vitis vinifera</i> VviPI           | NM_001280946.1 |
| <i>Zea mays</i> ZMM16                 | NM_001111666.1 |

AG-like genes

|                                      |            |
|--------------------------------------|------------|
| <i>Amborella trichopoda</i> Am.tr.AG | AY936231.1 |
| <i>Nuphar advena</i> Nu.ad.AG        | AY936230.1 |

AGL6-like genes

|                                        |            |
|----------------------------------------|------------|
| <i>Amborella trichopoda</i> Am.tr.AGL6 | AY936234.1 |
| <i>Nuphar advena</i> Nu.ad.AGL6.1      | KF925499   |
| <i>Nuphar advena</i> Nu.ad.AGL6.2      | KF925500   |

---

---

LOFSEP-like genes

*Amborella trichopoda* AMtrAGL2 AY850179.1  
*Nuphar advena* Nu.ad.AGL2 KF925501

AGL9-like genes

*Amborella trichopoda* AMtrAGL9 KF925502  
*Liriodendron tulipifera* LituAGL9 AY850182.1

---

Table S2. cDNA sequences used to generate C-terminal deleted proteins for EMSAs.

|                                                                                                                                                                                                                                                                                                                                                                                                                                                                                                                                                                            |
|----------------------------------------------------------------------------------------------------------------------------------------------------------------------------------------------------------------------------------------------------------------------------------------------------------------------------------------------------------------------------------------------------------------------------------------------------------------------------------------------------------------------------------------------------------------------------|
| >LtAP3 ΔC<br>ATGGGAAGAGGGGAAGATAGAGATAAAAAGAATAGAGAATTCGACGAACAGGCAAGTTACATATTCTAAGAG<br>AAGAGGTGGGATTATGAAGAAAGCAAAGAGCTTACCGTTCTCTGCGATGCTGAGGTTTCTCTCATCATGTTTT<br>CCAGCACTGGGAAATTCTCTGAATATTGCAGCCCTTCTACAACGACGAAGAAGATTTTCGATCGTTACCAGCAA<br>GTTTCAGGCAGCAGCTTATGGAAGTCTCACTACGAGAAAATGCAAAGTCACTTGAACAACTCAAAGAGGATA<br>ATAACAGTCTCCGGAGGGCAATCAGGCATAGGATCGGTGAAGATCTGGACGATCTGGAAATCGAAGAACTGC<br>GCGGTCTTGAGCAAATTTAGAAAGTTCTATCAAAGTTGTTGCGGAAAGAAAGTATCATGTGATCAACACTCA<br>AACAGAGACTTACAAGAAAAGTTGAGAACTTGCACGAAGCACACGCAAATTTAATTCGTGTAA                    |
| >LtPI ΔC<br>ATGGGGCGTGGGAAGATAGAGATAAAAAGGATAGAGAATCCACAACCGACAGGTGACCTATTCAAAGAG<br>GAGAGGAGGGATACTGAAGAAAGCAAAGGAGATCACCGTTTTGTGTGACGCGCAGGTCTCCCTCGTCATCTTC<br>TCTAGCACTGGGAAGATTTCCGAGTACTGTAGTCCCTCCACCACGCTGGTGAAGATTTTGGATCGCTACCAGAA<br>GAGCTCAGGGAAGAAGCTCTGGGATGCTAAGCACGAGCATCTTAGCAATGAAGTTGAAAGGATTAAGAAAGA<br>GAATGATAGCATGCAGATCAAGCTCAGGCATTTGAAGGGCGAGGATATCACCTCATTGCATCCGAGGGAACTC<br>ATCCCTATAGAGGAAGCCCTCCAAAACGGTCTTGCTGCTGCTCCAAGCAGATGGAGTACTTAAAGATGC<br>TCAAGAAGAATGAAAGAACTCTGGAGGAGGAGAATAAGCGCTTGAGTTATATCCTGCATCAGCAGCAACTGG<br>CGATGTAA     |
| >Nu.ad.AP3.1 ΔC<br>ATGGGTCGTGGGAAGATAGAGATAAGGAGGATAGAGAGCACCACCAACAGGCAGGTGACCTTCTCCAAGAG<br>GAGGGCAGGGATCATCAAGAAGGCCAAGGAGCTCACCGTCTCTGTGATGCCACGTCTCCTTGATCCTCTTCT<br>CCAGCACCAACAAGCTCTTCGAGTATTGTAGCCCCACCACCACGAAGAAAATAATCGATCGTTATCAGCAA<br>GTTACTGCAACCAATTTATGGGATCCCATTATGAAAGTATGCAAAGGAATTAACAAGCTCAAGGAGAAGA<br>ATGAAAGACTCCGCAGGAGCATCAGGCAAAGGAATGGCGAGGATTTAGATATGTTAAACCATTCTGAGCTGT<br>GCGGTCTTGAGCAAATCTGAGCGAAGCGCTTAAGAAAATCCGATCAGTATTGGATAACAAAATCAAGAGAC<br>AGATAGATACTTATAGGAAAAAGATAAAGGCAGCCGATTCCATTAGAAACATAGGTTTCATGTAA                    |
| >Nu.ad.AP3.2 ΔC<br>ATGGGTCGTGGGAAGATAGAGATAAAGAGGATAGAGAACACCACCAACAGGCAGGTGACCTTCTCCAAGAG<br>GAGGGCTGGGATCATCAAGAAGGCCAAGGAGCTCACCGTCTCTGCGATGCCACGTCTCCCTCATCTCTTCT<br>CCAGCACCCACAAGTTTTTTGAGTACTGTAGCCCTACCACCAACACGAAGAAGATGATTGATCGTTATCAGCAA<br>GTTACTGGAACAAATTTATGGGATACCCATTATGAAAGTATGCAAAGGAATTTAACAACTCAAGGAGAAGA<br>ATGAAAGGCTCCGCAAGAGCATGAGGCAACGGTTGGTGAGGATCTTGATGAGTTAAATCACTCCGAGCTGT<br>GCGGTCTTGAGCAAATCTAAGCGAAGCGTTGAAGAAGATCAGATTGGCACTTGATAGCAAATCAAGAGAC<br>AGATAGATACTTACAAGAAAAAGATAAAGGTCTGCTGAGAGCAACAGAAACAAAGTTTTTCAGGGATGCACAAG<br>AATAA |

>Nu.ad.PI1 ΔC

ATGGGGAGAGGAAAGATTGAGATCAAGAGGATAGAGAATGCTTCCAACAGGCAGGTCACCTTCTCCAAGAGG  
AAACAGGGTATCTTGAAGAAGGCCAAGGAGATCAGTGTTCTCTGTGACGCTCAGGTCTCTCTCATCTTGTCTC  
TAGTGCTGGCAAGCTCTACGATTATTGCTCCCCTTCTAGCAGTTTGAAGGACATTCTGACTAGATAACCAGAAGT  
CTTCTGGGAAGAAGTTGTGGGATGCTAGACATGAGTATCTGAGCACAGAGTTAGACAGGATTAGGAAGGAGA  
ATGAAAATATGCAAATTGAACTCAGGCATTTTATGGGTGAAGATCTGAGTTCCTGACCGTTCAAGAGCTTCG  
AGCTCTTGAAGACTCTTTCAGATTGGCTTTGATAATGTTACGTCAAGCAGACCGAATGCCTGAACAATGATA  
TTCAAATTCTGAAGAAGAATGAGAGGATCCTTGAGGAGGAGAATAGGCAGATGAAATATATACTGTAA

>Nu.ad.PI2 ΔC

ATGGGGAGAGGAAAGATTGAGATCAAGAGGATAGAGAATGCTTCCAACAGGCAGGTCACCTTCTCCAAGAGG  
AAACAGGGTATCTTGAAGAAGGCCAAGGAGATCAGTGTTCTCTGTGATTCTCAGGTCTCTCTCATCTTGTCTC  
CAGTGCTGGCAAGCTCTACGAGTATTGCTCCCCTTCTAGCAGTTTGAAGGACGTTCTGACTAGATAACCAGAAGT  
CTTCTGGGAAGAAGTTGTGGGATGCTAGACATGAGTATCTGAGCACAGAGTTAGACAGGATTAGGAAGGAGA  
ATGAAAATATGCAGATTGAACTCAGGCATTTTATGGGTGAAGATCTGAGTTCCTGACCGTTCAAGAGCTTCG  
AGCTCTTGAAGACTCTTTCAGATTGGCTTTGATAGTGTGCACATAAAGCAGACAGAATGCCTGAACAATGATA  
TTCAAATTCTGAAGAAGAATGAGAGGATCCTCGAGGAGGAGAATAGGCAGCTGAAATATATACTGTAA

>Nu.ad.AG ΔC

ATGGGAAGAGGTAAGATCGAGATCAAGCGCATAGAGAACACGACTAACCGGCAGGTTACCTTCTGCAAGCGC  
CGGAGCGGGCTGCTCAAGAAGGCTTACGAGTTGTCGGTCTGCGATGCCGAGGTCTCCCTCATCATCTTCT  
CCAGCCGTGGCCGTCTTATGAGTATTCAAACAACAGTGTTAAGGCAACAATTGATAGGTACAAGAAAGCATG  
TGCGGACAGTTTGAAGTTCGGAAGTCTGTTCTGAAGCAAACGCACAGTATTACCAACAAGAAGCATATAAACTA  
CGCCAGCAAATCAGTAAAATACAACAAGATAACAGGCAAATGCTGGGTGAAGGTATCAATGAAATGTCTGTA  
AGAGATCTCAAGACTTTAGAGGGGAAAATTGGAGAAAAGCATTGGCAAATAAGATCCAAAAGAATGATTTG  
CTGAATAGTGAAATCCAGTACATGCAGAAAATGGGTGATGATCTGCAGGAAGAGAATATGTATCTTAGAGCA  
AAGATTAGTGAGAATGAAAGGGCGCATTA

>AmAP3 ΔC

ATGGGTAGAGGGAAGATAGAGATAAAGAGGATAGAGAACCCAACAACAGGCAGGTCACCTACTCGAAGAG  
AAGAGGGGGAATCATCAAGAAGGCCAAGGAGCTCACAGTCTCTGCGATGCTGAGGTCTCCCTTATAATGTTT  
TCCAGCACTGGCAAGTTCTCCGAGTATTGCAGCCCTTCTACAAGCACGAAGAAGATTACGATCGATACCAGCA  
AGTCTCAGAAACCAACTTATGGGACACCCACTATGAGAAGATGCAAAGGGACTTGGGCAATCTCAAGGAGGA  
GAGTAACCGGCTTCGAAACTTATAAGGCAAAAAGATGGGGGAAGATATTAATGAATTGAAATATAAAGAGCT  
GCGTGATCTTGAGCAAAATCTTGAGGAATGGGTGAAACGCATCAGAGATAAGAAGAACCATTTGGTGACAAA  
CCAAACTGAAACATGTAAAAAAGGATAAAGAATTTGGAGGAGCAAAACAAAATGATGAGGCATATGATGGA  
AGAAGATGAAGCAGAACGATGA

>AmPI ΔC

ATGGGGAGGGGGAAGATTGAGATAAAGCGGATAGAGAACTCGGCGAACAGGCAGGTGACTTATTGGAAGAG  
GAAGAGCGGAATACTGAAGAAGGCCAAGGAGATTTGCGTTCTATGCGATGCCAAGGTCTCCCTCGTCATATTC  
TCCAGTGCTGGCAAAATGTCCGAGTTTTGCAGTCCATCCATCGAGTTGAAGAATATGCTAGAAGAGTACCAGA  
GGACTTCAGGGAAAAAGTTATGGGATCCCGTCATGAGTATTTGAGCACAGAGGTAGATAGGATGAAGAAAG  
ACAACGAACAGATGAGGATTGAGTTGAGGCACTTGATGGGAGAAGATCTCAACTATTGACGCCCCATGAACT  
CAATAGGATTGAGGACTCCCTGCAAATGGGCCTCTCCAGTGTTCTGTGCTAAACAGATGGAACACATTTCGACC  
AGGACTGAGATGCTAAAAACAACGAAAGGATTCTCGAAGATCAGAACAACAATTGAAGTACATAATGTGA

|                                                                                                                                                                                                                                                                                                                                                                                                                                                                                                                                                                                                                                      |
|--------------------------------------------------------------------------------------------------------------------------------------------------------------------------------------------------------------------------------------------------------------------------------------------------------------------------------------------------------------------------------------------------------------------------------------------------------------------------------------------------------------------------------------------------------------------------------------------------------------------------------------|
| <p>&gt;Am.tr.AG ΔC</p> <p>ATGGGAAGGGGAAAGATTGAGATCAAGCGCATAGAGAACACAACATAATAGGCAGGTGACCTTTTGCAAACGG<br/> CGCAATGGGCTACTCAAGAAAGCCTATGAATTATCTGTTCTCTGTGATGCTGAAGTTGCACTTATTGTCTTTTCA<br/> AGTCGAGGTCGACTGTACGAATATGCAAATAACAGCGTGAAAACAACAATTGATAGGTACAAGAAGGCATGC<br/> GCTGATAGCTCTCACTCCGGAAGTGTTCAGAGGCCAATTCTCAATATTACCAACAAGAAGCTGCAAACTTCG<br/> CAATCAAATCCAGGTTTTAACGAATACAAACAGGCAGTTGATGGGTGACTCCGTTGGTTCAATGACTGTTAAG<br/> GAGCTCAGGACATTGGAGAACAATTGGAAAAGGGAATTAGTAAAATTAGATCAAAAAGAATGAGCTACTA<br/> TTCGCTGAAATCGACTACATGCAGAATCGGGAAGTGAAGTACAGAAAGACAACATGCTTCTCCGAGCTTAA</p>                                         |
| <p>&gt;Am.tr.AGL6 ΔC</p> <p>ATGGGGAGAGGAAGGGTGGAGCTGAAGCGAATCGAGAACAAGATCAACAGGCAAGTGACCTTCTCCAAGAG<br/> GAGGAACGGTTTGCTCAAGAAGGCGTATGAGCTCTCTGTGCTTTCGATGCCGAGGTCGGACTGATCATCTTC<br/> TCCAGCCGCGGAAAGCTTACGAGTTCGGAAGCGCCGGTCTGAGCAAAACCTCGAGAGGTACCAGAGGTGT<br/> TGTTACACCCACAAGACAATAGTCCACTGATCGTGAAACACAGAATTGGTCTCAAGAATTGTCAAATTGAA<br/> GGCAAAATATGAGACTCTACAACGATCACAAGACATTTGCTTGGGGAAGACCTTGACCTCTGAGTGTCAAG<br/> GAACTACAACAACCTTGAACGACAACCTTGAAGTCGCTCTTCTCAGGCCAGGCAAAGAAAGACACAAATATTGA<br/> TGGATCAAATGGAAGAGCTTCGAGGAAGGAGCGGCGCCTCGGAGACATAAATAAGCAGCTCAAGAGCAAG<br/> CTGGAGTCAGATGGTCAAGGCTCTTTCAGATAA</p>       |
| <p>&gt;AMtrAGL2 ΔC</p> <p>ATGGGAAGAGGTAGAGTTGAGCTCAAGAGGATAGAGAACAAGATCAACAGGCAGGTGACCTTTGCGAAGAG<br/> GAGGAATGGTCTTTTGAAGAAGGCTTATGAACTCTCTGTTCTCTGTGATGCTGAGGTTGCCCTAATCATTTTCTC<br/> CAATAGAGGGAAGCTTACGAGTTTTGTAGCACCTTAGCATGGTGAAGACATTAGAGAGGTACCAAAAATGC<br/> AACTATGGAGCATTAGAACTAATGTACCGACCAGGGAGACACAGAGCAGCTATCAAGAATATTTAAAGCTGA<br/> AAGCGAGGGTGGAGTCTCTACAACGATCCAGAGGAACCTTCTTGGTGAAGACTTGGGCCCTTAAGTTCAA<br/> AGAGCTTGAACAACCTGAGCAGCAACTGGAGATGTCTTGAAGCAGATAAGGTCTACTAAGACACAATGCATG<br/> TTTGATCAACTTGTGACCTTAGGAGGAGGGAAGTCTCTCAAGAGACCAACAAGCTTTGAAACGTAAGT<br/> TGGAGGGAGCAAGCGCTTCAAACCCCCACAACCTTGCATAA</p> |

Table 3. List of publications from which protein–protein interaction data were extracted.

|                                               |                                                                                                                                                                                        |
|-----------------------------------------------|----------------------------------------------------------------------------------------------------------------------------------------------------------------------------------------|
| <i>Akebia trifoliata</i>                      | (Shan et al., 2006)<br>(Liu et al., 2010)                                                                                                                                              |
| <i>Amborella trichopoda</i>                   | this study                                                                                                                                                                             |
| <i>Antirrhinum majus</i>                      | (Davies et al., 1996)<br>(Egea-Cortines et al., 1999)<br>(Causier et al., 2003)                                                                                                        |
| <i>Aquilegia vulgaris</i>                     | (Kramer et al., 2007)                                                                                                                                                                  |
| <i>Arabidopsis thaliana</i>                   | (Goto and Meyerowitz, 1994)<br>(Riechmann et al., 1996)<br>(Honma and Goto, 2001)<br>(Winter et al., 2002)<br>(Yang et al., 2003)<br>(Yang and Jack, 2004)<br>(de Folter et al., 2005) |
| <i>Brassica napus</i>                         | (Deng et al., 2011)                                                                                                                                                                    |
| <i>Camellia japonica</i>                      | (Viaene et al., 2009)                                                                                                                                                                  |
| <i>Chloranthus spicatus</i>                   | (Su et al., 2008)                                                                                                                                                                      |
| <i>Chrysanthemum Dendrathera grandiflorum</i> | (Shchennikova et al., 2004)                                                                                                                                                            |
| <i>Davidia involucreta</i>                    | (Vekemans et al., 2012)                                                                                                                                                                |
| <i>Dendrobium crumenatum</i>                  | (Xu et al., 2006)                                                                                                                                                                      |
| <i>Eschscholzia californica</i>               | (Lange et al., 2013)                                                                                                                                                                   |
| <i>Euptelea pleiospermum</i>                  | (Liu et al., 2010)                                                                                                                                                                     |
| <i>Gerbera hybrida</i>                        | (Broholm et al., 2009)<br>(Ruokolainen et al., 2010)                                                                                                                                   |

|                                |                                                                                                                                           |
|--------------------------------|-------------------------------------------------------------------------------------------------------------------------------------------|
| <i>Gnetum gnemon</i>           | (Winter et al., 2002)<br>(Wang et al., 2010)                                                                                              |
| <i>Hedyosmum orientale</i>     | (Liu et al., 2013)                                                                                                                        |
| <i>Impatiens hawkeri</i>       | (Geuten et al., 2006)                                                                                                                     |
| <i>Joinvillea ascendens</i>    | (Whipple and Schmidt, 2006)                                                                                                               |
| <i>Lacandonia schismatica</i>  | (Alvarez-Buylla et al., 2010)                                                                                                             |
| <i>Lilium longiflorum</i>      | (Tzeng, 2003)<br>(Chen et al., 2011)                                                                                                      |
| <i>Lilium regale</i>           | (Winter et al., 2002)                                                                                                                     |
| <i>Liriodendron tulipifera</i> | this study                                                                                                                                |
| <i>Medicago truncatula</i>     | (Roque et al., 2013)                                                                                                                      |
| <i>Nicotiana benthamiana</i>   | (Geuten and Irish, 2010)                                                                                                                  |
| <i>Nuphar advena</i>           | this study                                                                                                                                |
| <i>Oncidium 'Gower Ramsey'</i> | (Hsu and Yang, 2002)<br>(Hsu et al., 2003)<br>(Chang et al., 2010)                                                                        |
| <i>Oryza sativa</i>            | (Moon et al., 1999a)<br>(Moon et al., 1999b)<br>(Favaro et al., 2002)<br>(Ronai et al., 2003)<br>(Lee et al., 2003)<br>(Yao et al., 2008) |
| <i>Osmanthus fragrans</i>      | (Lee and Irish, 2011)                                                                                                                     |
| <i>Pachysandra terminalis</i>  | (Liu et al., 2010)                                                                                                                        |
| <i>Papaver somniferum</i>      | (Drea et al., 2007)                                                                                                                       |
| <i>Petunia hybrida</i>         | (Immink et al., 2003)<br>(Vandenbussche, 2004)<br>(Rijpkema et al., 2006)<br>(Rijpkema et al., 2009)                                      |
| <i>Phaleanopsis equestris</i>  | (Tsai et al., 2008)                                                                                                                       |
| <i>Picea abies</i>             | (Sundstrom and Engstrom, 2002)                                                                                                            |
| <i>Solanum lycopersicum</i>    | (de Martino et al., 2006)<br>(Leseberg et al., 2008)                                                                                      |
| <i>Taihangia rupestris</i>     | (Lü et al., 2010)                                                                                                                         |
| <i>Tulipa gesneriana</i>       | (Kanno et al., 2003)                                                                                                                      |
| <i>Vitis vinifera</i>          | (Mellway and Lund, 2013)                                                                                                                  |
| <i>Zea mays</i>                | (Whipple, 2004)<br>(Whipple and Schmidt, 2006)                                                                                            |

## References

- Alvarez-Buylla ER, Ambrose BA, Flores-Sandoval E, Englund M, Garay-Arroyo A, Garcia-Ponce B, de la Torre-Barcena E, Espinosa-Matias S, Martinez E, Pineyro-Nelson A, Engstrom P, Meyerowitz EM. 2010.** B-Function expression in the flower center underlies the homeotic phenotype of *Lacandonia schismatica* (Triuridaceae). *Plant Cell*, **22**: 3543-3559.
- Broholm SK, Pollanen E, Ruokolainen S, Tahtiharju S, Kotilainen M, Albert VA, Elomaa P, Teeri TH. 2009.** Functional characterization of B class MADS-box transcription factors in *Gerbera hybrida*. *Journal of Experimental Botany*, **61**: 75-85.
- Causier B, Cook H, Davies B. 2003.** An *Antirrhinum* ternary complex factor specifically interacts with C-function and *SEPALLATA*-like MADS-box factors. *Plant Molecular Biology*, **52**: 1051-62.
- Chang YY, Kao NH, Li JY, Hsu WH, Liang YL, Wu JW, Yang CH. 2010.** Characterization of the possible roles for B class MADS box genes in regulation of perianth formation in orchid. *Plant Physiology*, **152**: 837-853.
- Chen MK, Hsieh WP, Yang CH. 2011.** Functional analysis reveals the possible role of the C-terminal sequences and PI motif in the function of lily (*Lilium longiflorum*) PISTILLATA (PI) orthologues. *Journal of Experimental Botany*, **63**: 941-961.

- Davies B, Egea-Cortines M, de Andrade Silva E, Saedler H, Sommer H. 1996.** Multiple interactions amongst floral homeotic MADS box proteins. *EMBO Journal*, **15**: 4330-43.
- de Folter S, Immink RG, Kieffer M, Parenicova L, Henz SR, Weigel D, Busscher M, Kooiker M, Colombo L, Kater MM, Davies B, Angenent GC. 2005.** Comprehensive interaction map of the *Arabidopsis* MADS box transcription factors. *Plant Cell*, **17**: 1424-33.
- de Martino G, Pan I, Emmanuel E, Levy A, Irish VF. 2006.** Functional analyses of two tomato APETALA3 genes demonstrate diversification in their roles in regulating floral development. *Plant Cell*, **18**: 1833-1845.
- Deng W, Zhou L, Zhou Y, Wang Y, Wang M, Zhao Y. 2011.** Isolation and characterization of three duplicated PISTILLATA genes in *Brassica napus*. *Molecular Biology Reports*, **38**: 3113-3120.
- Drea S, Hileman LC, de Martino G, Irish VF. 2007.** Functional analyses of genetic pathways controlling petal specification in poppy. *Development*, **134**: 4157-4166.
- Egea-Cortines M, Saedler H, Sommer H. 1999.** Ternary complex formation between the MADS-box proteins SQUAMOSA, DEFICIENS and GLOBOSA is involved in the control of floral architecture in *Antirrhinum majus*. *EMBO Journal*, **18**: 5370-9.
- Favaro R, Immink RG, Ferioli V, Bernasconi B, Byzova M, Angenent GC, Kater M, Colombo L. 2002.** Ovule-specific MADS-box proteins have conserved protein-protein interactions in monocot and dicot plants. *Molecular Genetics and Genomics*, **268**: 152-159.
- Geuten K, Becker A, Kaufmann K, Caris P, Janssens S, Viaene T, Theißen G, Smets E. 2006.** Petaloidy and petal identity MADS-box genes in the balsaminoid genera *Impatiens* and *Marcgravia*. *Plant Journal*, **47**: 501-518.
- Geuten K, Irish V. 2010.** Hidden variability of floral homeotic B genes in Solanaceae provides a molecular basis for the evolution of novel functions. *Plant Cell*, **22**: 2562-2578.
- Goto K, Meyerowitz EM. 1994.** Function and regulation of the *Arabidopsis* floral homeotic gene *Pistillata*. *Genes & Development*, **8**: 1548-1560.
- Honma T, Goto K. 2001.** Complexes of MADS-box proteins are sufficient to convert leaves into floral organs. *Nature*, **409**: 525-9.
- Hsu HF, Huang CH, Chou LT, Yang CH. 2003.** Ectopic expression of an orchid (*Oncidium Gower Ramsey*) *AGL6*-like gene promotes flowering by activating flowering time genes in *Arabidopsis thaliana*. *Plant and Cell Physiology*, **44**: 783-794.
- Hsu HF, Yang CH. 2002.** An orchid (*Oncidium Gower Ramsey*) *AP3*-like MADS gene regulates floral formation and initiation. *Plant and Cell Physiology*, **43**: 1198-209.
- Immink RG, Ferrario S, Busscher-Lange J, Kooiker M, Busscher M, Angenent GC. 2003.** Analysis of the petunia MADS-box transcription factor family. *Molecular Genetics and Genomics*, **268**: 598-606.
- Kanno A, Saeki H, Kameya T, Saedler H, Theissen G. 2003.** Heterotopic expression of class B floral homeotic genes supports a modified ABC model for tulip (*Tulipa gesneriana*). *Plant Molecular Biology*, **52**: 831-41.
- Kramer EM, Holappa L, Gould B, Jaramillo MA, Setnikov D, Santiago PM. 2007.** Elaboration of B gene function to include the identity of novel floral organs in the lower eudicot *Aquilegia*. *Plant Cell*, **19**: 750-766.
- Lange M, Orashakova S, Lange S, Melzer R, Theissen G, Smyth DR, Becker A. 2013.** The seirena B class floral homeotic mutant of California Poppy (*Eschscholzia californica*) reveals a function of the enigmatic PI motif in the formation of specific multimeric MADS domain protein complexes. *Plant Cell*, **25**: 438-53.
- Lee HL, Irish VF. 2011.** Gene duplication and loss in a MADS box gene transcription factor circuit. *Molecular Biology and Evolution*, **28**: 3367-80.
- Lee S, Jeon J-S, An K, Moon Y-H, Lee S, Chung Y-Y, An G. 2003.** Alteration of floral organ identity in rice through ectopic expression of OsMADS16. *Planta*, **217**: 904-911.
- Leseberg CH, Eissler CL, Wang X, Johns MA, Duvall MR, Mao L. 2008.** Interaction study of MADS-domain proteins in tomato. *Journal of Experimental Botany*, **59**: 2253-2265.
- Liu CJ, Zhang JA, Zhang N, Shan HY, Su KM, Zhang JS, Meng Z, Kong HZ, Chen ZD. 2010.** Interactions among proteins of floral MADS-box genes in basal eudicots: implications for evolution of the regulatory network for flower development. *Molecular Biology and Evolution*, **27**: 1598-1611.



- Liu SJ, Sun YH, Du XQ, Xu QJ, Wu F, Meng Z. 2013.** Analysis of the APETALA3- and PISTILLATA-like genes in *Hedyosmum orientale* (Chloranthaceae) provides insight into the evolution of the floral homeotic B-function in angiosperms. *Annals of Botany*, **112**: 1239-1251.
- Lü S, Fan Y, Liu L, Liu S, Zhang W, Meng Z. 2010.** Ectopic expression of *TrPI*, a *Taihangia rupestris* (Rosaceae) *PI* ortholog, causes modifications of vegetative architecture in *Arabidopsis*. *Journal of Plant Physiology*, **167**: 1613-1621.
- Mellway RD, Lund ST. 2013.** Interaction analysis of grapevine MIKCC-type MADS transcription factors and heterologous expression of putative véraison regulators in tomato. *Journal of Plant Physiology*, **170**: 1424-1433.
- Moon YH, Jung JY, Kang HG, An G. 1999a.** Identification of a rice APETALA3 homologue by yeast two-hybrid screening. *Plant Molecular Biology*, **40**: 167-77.
- Moon YH, Kang HG, Jung JY, Jeon JS, Sung SK, An G. 1999b.** Determination of the motif responsible for interaction between the rice APETALA1/AGAMOUS-LIKE9 family proteins using a yeast two-hybrid system. *Plant Physiology*, **120**: 1193-204.
- Riechmann JL, Krizek BA, Meyerowitz EM. 1996.** Dimerization specificity of Arabidopsis MADS domain homeotic proteins APETALA1, APETALA3, PISTILLATA, and AGAMOUS. *Proceedings of the National Academy of Sciences of the United States of America*, **93**: 4793-4798.
- Rijpkema AS, Royaert S, Zethof J, van der Weerden G, Gerats T, Vandenbussche M. 2006.** Analysis of the *Petunia TM6* MADS box gene reveals functional divergence within the *DEF/AP3* lineage. *Plant Cell*, **18**: 1819-1832.
- Rijpkema AS, Zethof J, Gerats T, Vandenbussche M. 2009.** The petunia *AGL6* gene has a *SEPALLATA*-like function in floral patterning. *Plant Journal*, **60**: 1-9.
- Ronai Z, Wang Y, Khandurina J, Budworth P, Sasvari-Szekely M, Wang X, Guttman A. 2003.** Transcription factor binding study by capillary zone electrophoretic mobility shift assay. *Electrophoresis*, **24**: 96-100.
- Roque E, Serwatowska J, Cruz Rochina M, Wen J, Mysore KS, Yenush L, Beltrán JP, Cañas LA. 2013.** Functional specialization of duplicated *AP3*-like genes in *Medicago truncatula*. *Plant Journal*, **73**: 663-675.
- Ruokolainen S, Ng Y, Albert VA, Elomaa P, Teeri TH. 2010.** Large scale interaction analysis predicts that the *Gerbera hybrida* floral E function is provided both by general and specialized proteins. *BMC Plant Biology*, **10**: 129.
- Shan H, Su K, Lu W, Kong H, Chen Z, Meng Z. 2006.** Conservation and divergence of candidate class B genes in *Akebia trifoliata* (Lardizabalaceae). *Development Genes and Evolution*, **216**: 785-795.
- Shchennikova AV, Shulga OA, Immink R, Skryabin KG, Angenent GC. 2004.** Identification and characterization of four chrysanthemum MADS-box genes, belonging to the *APETALA1/FRUITFULL* and *SEPALLATA3* subfamilies. *Plant Physiology*, **134**: 1632-1641.
- Su K, Zhao S, Shan H, Kong H, Lu W, Theissen G, Chen Z, Meng Z. 2008.** The MIK region rather than the C-terminal domain of AP3-like class B floral homeotic proteins determines functional specificity in the development and evolution of petals. *New Phytologist*, **178**: 544-558.
- Sundstrom J, Engstrom P. 2002.** Conifer reproductive development involves B-type MADS-box genes with distinct and different activities in male organ primordia. *Plant Journal*, **31**: 161-9.
- Tsai WC, Pan ZJ, Hsiao YY, Jeng MF, Wu TF, Chen WH, Chen HH. 2008.** Interactions of B-class complex proteins involved in tepal development in *Phalaenopsis* orchid. *Plant and Cell Physiology*, **49**: 814-824.
- Tzeng TY. 2003.** The C-terminal sequence of LMADS1 is essential for the formation of homodimers for B function proteins. *Journal of Biological Chemistry*, **279**: 10747-10755.
- Vandenbussche M. 2004.** The duplicated B-class heterodimer model: whorl-specific effects and complex genetic interactions in *Petunia hybrida* flower development. *Plant Cell*, **16**: 741-754.
- Vekemans D, Viaene T, Caris P, Geuten K. 2012.** Transference of function shapes organ identity in the dove tree inflorescence. *New Phytologist*, **193**: 216-228.
- Viaene T, Vekemans D, Irish VF, Geeraerts A, Huysmans S, Janssens S, Smets E, Geuten K. 2009.** *Pistillata*-duplications as a mode for floral diversification in (basal) asterids. *Molecular Biology and Evolution*, **26**: 2627-2645.

- Wang Y-Q, Melzer R, Theißen G. 2010.** Molecular interactions of orthologues of floral homeotic proteins from the gymnosperm *Gnetum gnemon* provide a clue to the evolutionary origin of 'floral quartets'. *Plant Journal*, **64**: 177-190.
- Whipple CJ. 2004.** Conservation of B-class floral homeotic gene function between maize and *Arabidopsis*. *Development*, **131**: 6083-6091.
- Whipple CJ, Schmidt RJ. 2006.** Genetics of grass flower development. *Advances in Botanical Research: Incorporating Advances in Plant Pathology, Vol 44*, **44**: 385-424.
- Winter KU, Weiser C, Kaufmann K, Bohne A, Kirchner C, Kanno A, Saedler H, Theissen G. 2002.** Evolution of class B floral homeotic proteins: obligate heterodimerization originated from homodimerization. *Molecular Biology and Evolution*, **19**: 587-96.
- Xu Y, Teo LL, Zhou J, Kumar PP, Yu H. 2006.** Floral organ identity genes in the orchid *Dendrobium crumenatum*. *Plant Journal*, **46**: 54-68.
- Yang YZ, Fanning L, Jack T. 2003.** The K domain mediates heterodimerization of the *Arabidopsis* floral organ identity proteins, APETALA3 and PISTILLATA. *Plant Journal*, **33**: 47-59.
- Yang YZ, Jack T. 2004.** Defining subdomains of the K domain important for protein-protein interactions of plant MADS proteins. *Plant Molecular Biology*, **55**: 45-59.
- Yao SG, Ohmori S, Kimizu M, Yoshida H. 2008.** Unequal genetic redundancy of rice *PISTILLATA* orthologs, *OsMADS2* and *OsMADS4*, in lodicule and stamen development. *Plant and Cell Physiology*, **49**: 853-857.
